# Supplementary material for: Synthesis of new DOPO derivatives and investigation of their synergistic effect with APP–PEI on the flame retardancy of epoxy composite
Source: Royal Society of Chemistry journal article supplement (doi:10.1039/d4ra00051j), 2024-01-01
Supplement: d4ra00051j1.pdf [file d4ra00051j1.pdf]

## Synthesis of new DOPO derivatives and investigation of their synergistic effect with APP-PEI on the flame retardancy of epoxy composite

Cong Trinh Duc,<sup>a</sup> Linh Chi Nguyen,<sup>a</sup> Phuc Ban Van,<sup>a</sup> Ha Thanh Nguyen,<sup>a,b</sup> Tuyet Anh Dang Thi,<sup>a,b</sup> Giang Le-Nhat-Thuy,<sup>a,b</sup> Quynh Giang Nguyen Thi,<sup>a</sup> Phuong Hoang Thi,<sup>a</sup> Tuan Anh Nguyen,<sup>a</sup> Quang Vinh Tran,<sup>a,b</sup> Hung Tran Quang,<sup>a,b</sup> Mai Ha Hoang,<sup>a,b</sup> and Tuyen Nguyen Van<sup>a,b\*</sup>

<sup>a</sup>Institute of Chemistry, Vietnam Academy of Science and Technology, 18 Hoang Quoc Viet, Cau Giay, Hanoi, Vietnam

<sup>b</sup>Graduate University of Science and Technology, Vietnam Academy of Science and Technology, 18 Hoang Quoc Viet, Cau Giay, Hanoi, Vietnam

Corresponding author: Prof. Dr. Tuyen Nguyen Van ([ngvtuyen@hotmail.com](mailto:ngvtuyen@hotmail.com), [ngvtuyen@ich.vast.vn](mailto:ngvtuyen@ich.vast.vn))

---

### Supporting Information

#### Table of Contents

|                    |    |
|--------------------|----|
| Compound FR1.....  | 2  |
| Compound FR2.....  | 3  |
| Compound FR3.....  | 5  |
| Compound FR4.....  | 6  |
| Compound FR5.....  | 8  |
| Compound FR6.....  | 9  |
| Compound FR7.....  | 11 |
| Compound FR8.....  | 12 |
| Compound FR9.....  | 14 |
| Compound FR10..... | 15 |
| Compound FR11..... | 17 |
| Compound FR12..... | 18 |
| Compound FR13..... | 20 |
| Compound FR14..... | 21 |
| Compound FR15..... | 23 |
| Compound FR16..... | 24 |
| APP-PEI.....       | 26 |

# Compound FR1

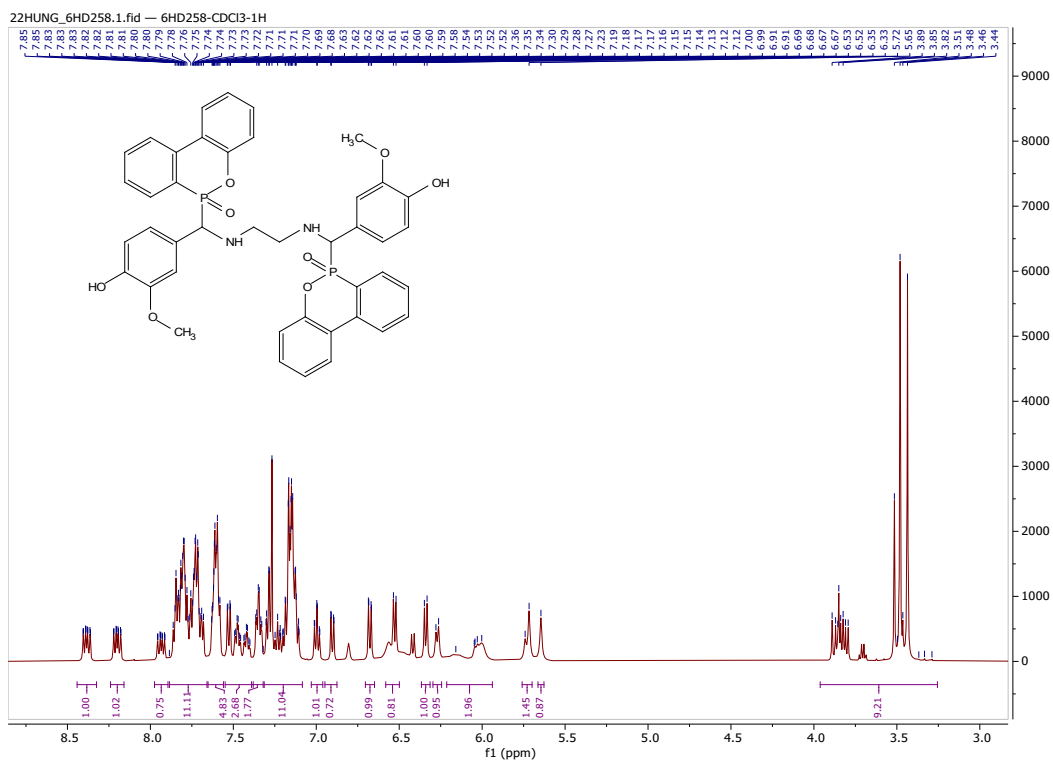

Figure 1:  $^1\text{H}$  NMR spectroscopy of compound FR1

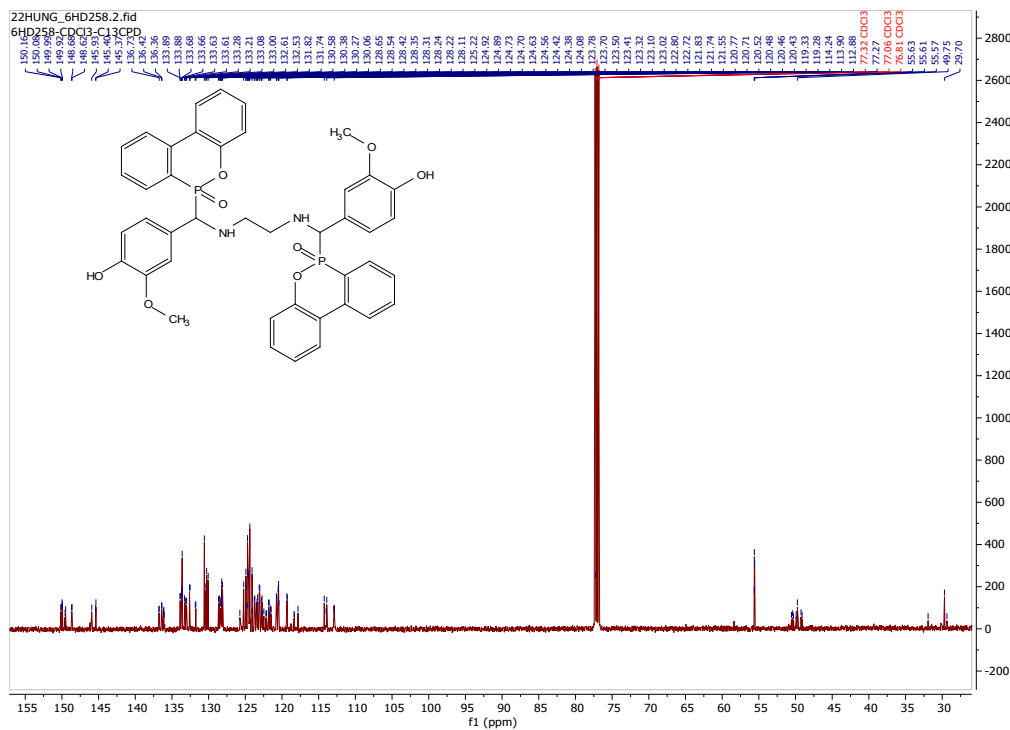

Figure 2:  $^{13}\text{C}$  NMR spectroscopy of compound FR1

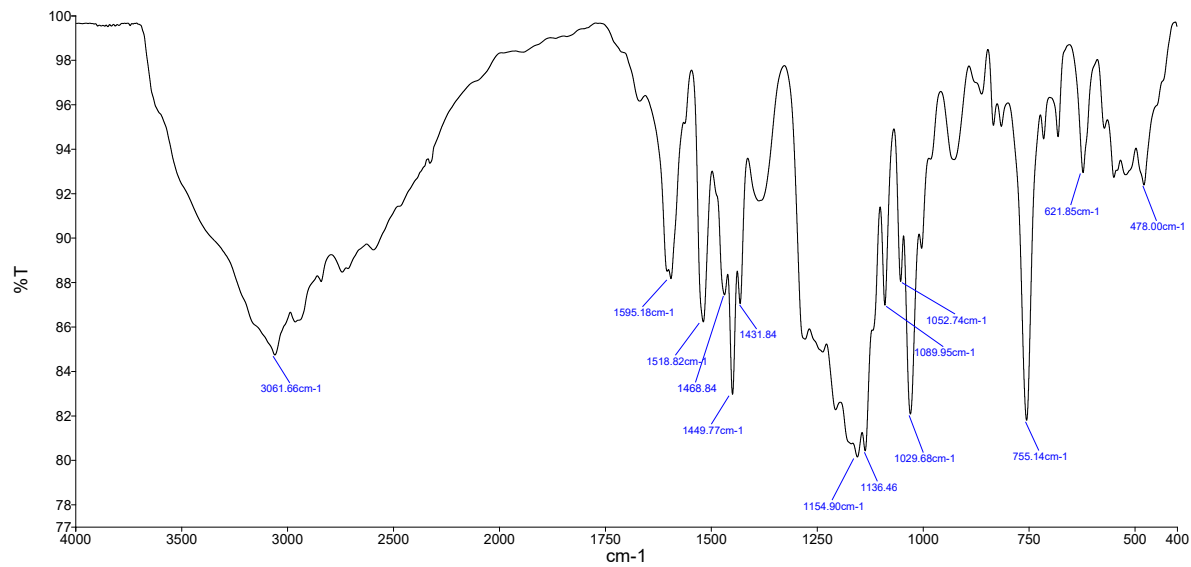

Figure 3: FT-IR spectroscopy of compound **FR1**

### Compound FR2

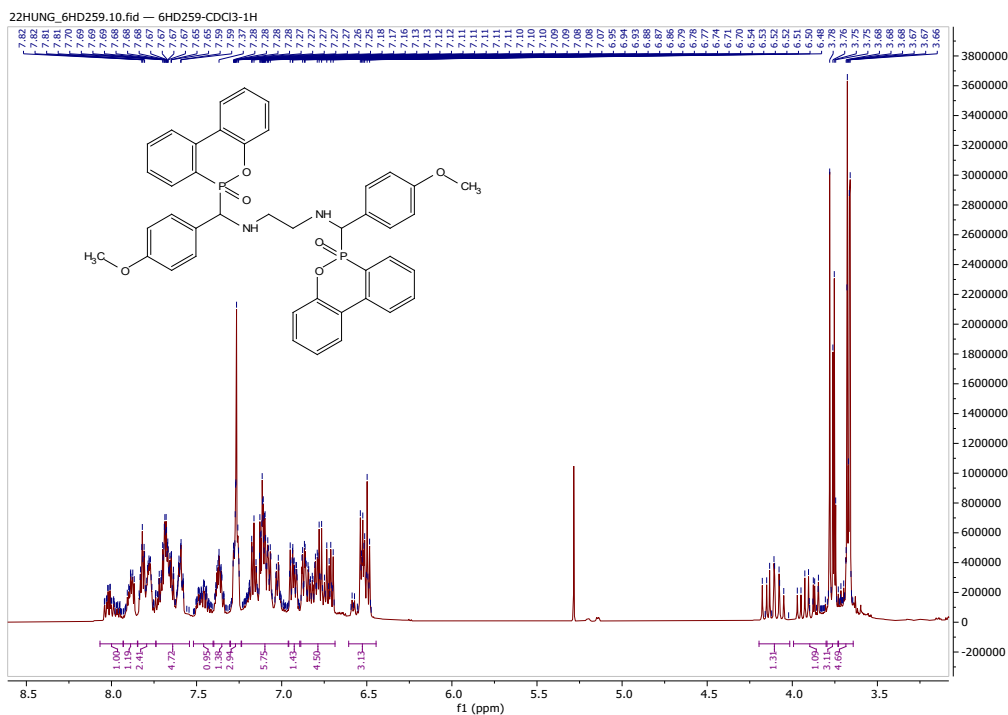

Figure 4: <sup>1</sup>H NMR spectroscopy of compound **FR2**

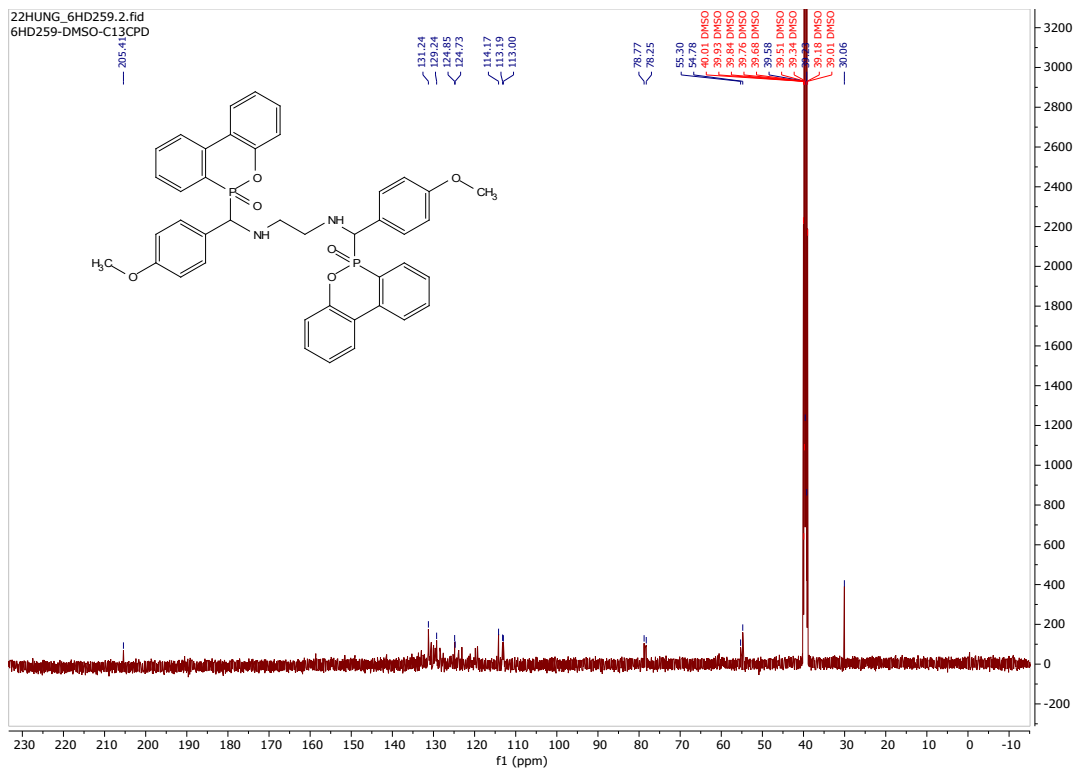

Figure 5:  $^{13}\text{C}$  NMR spectroscopy of compound **FR2**

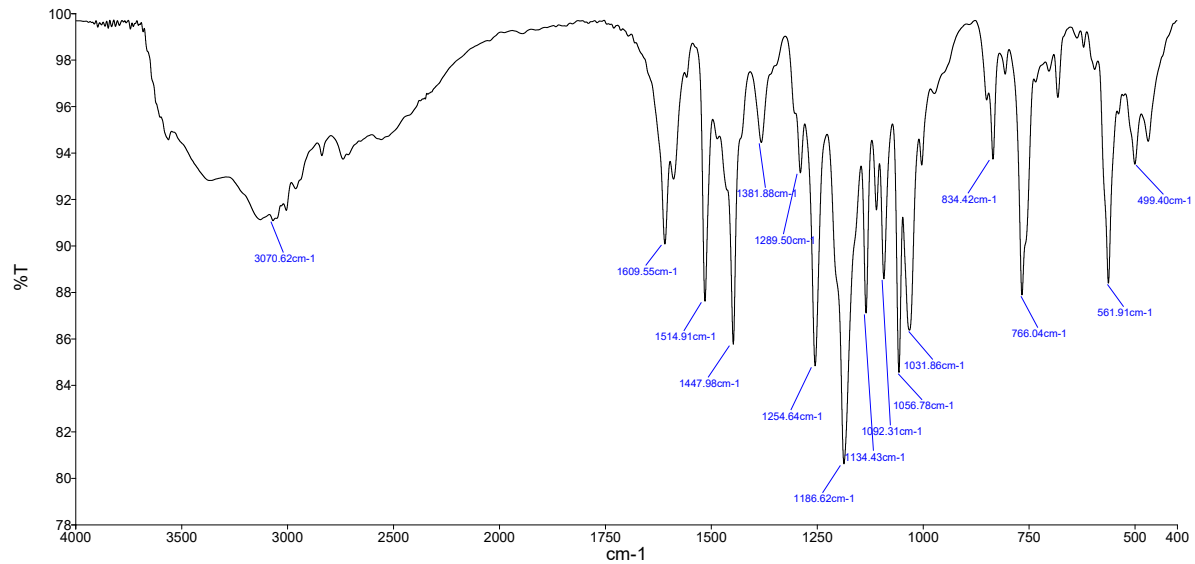

Figure 6: FT-IR spectroscopy of compound **FR2**

# Compound FR3

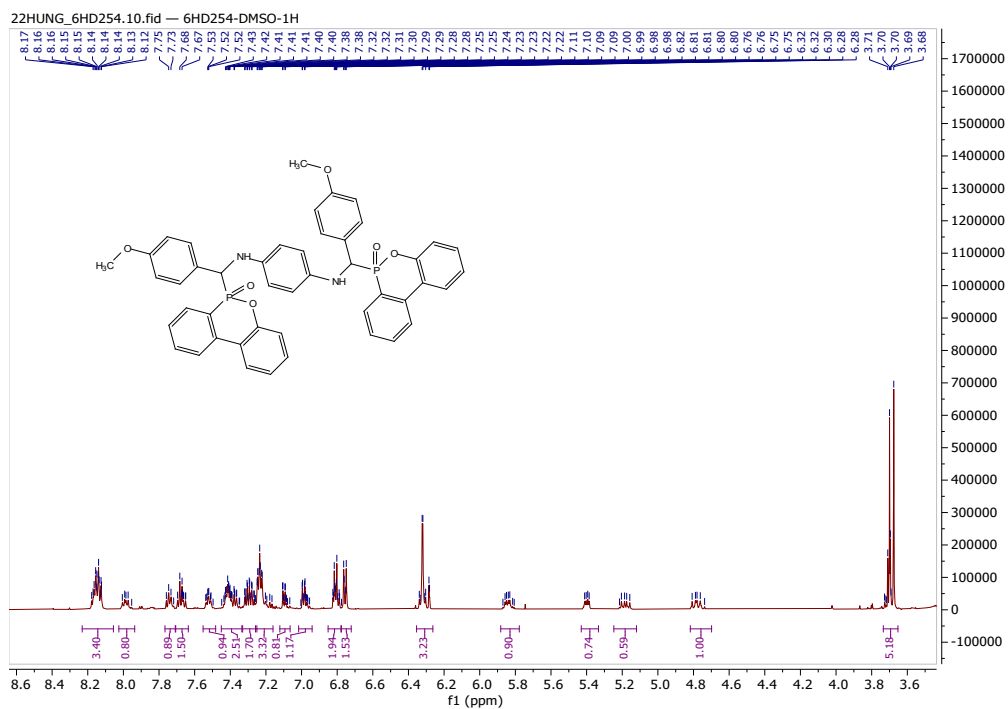

Figure 7:  $^1\text{H}$  NMR spectroscopy of compound FR3

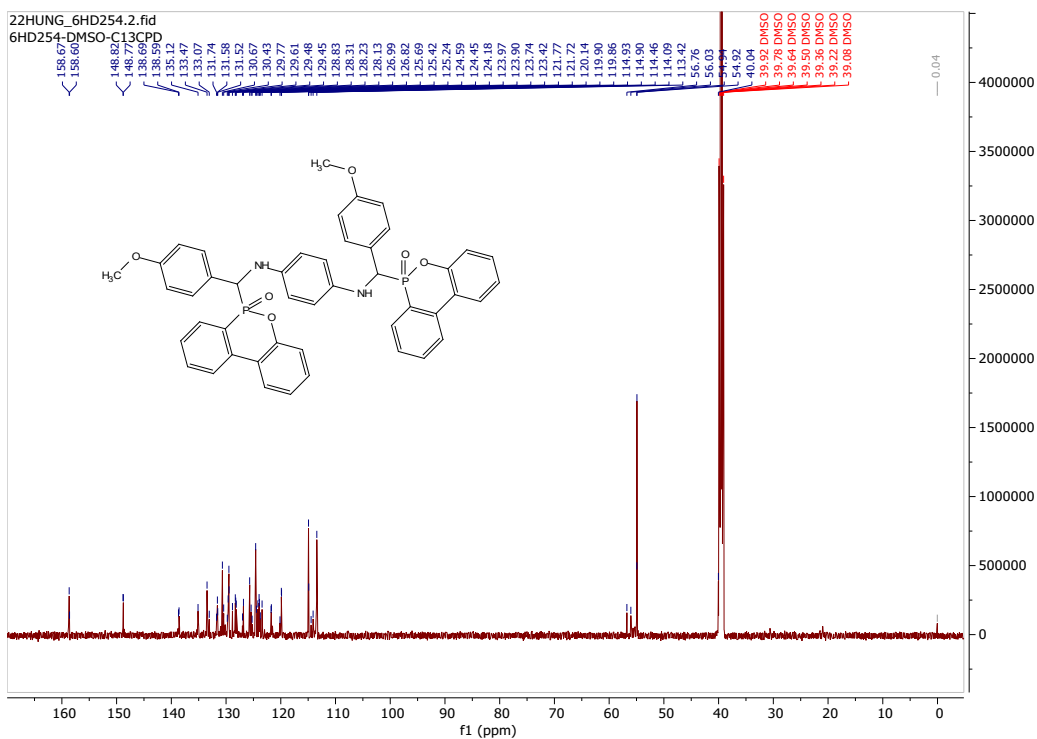

Figure 8:  $^{13}\text{C}$  NMR spectroscopy of compound FR3

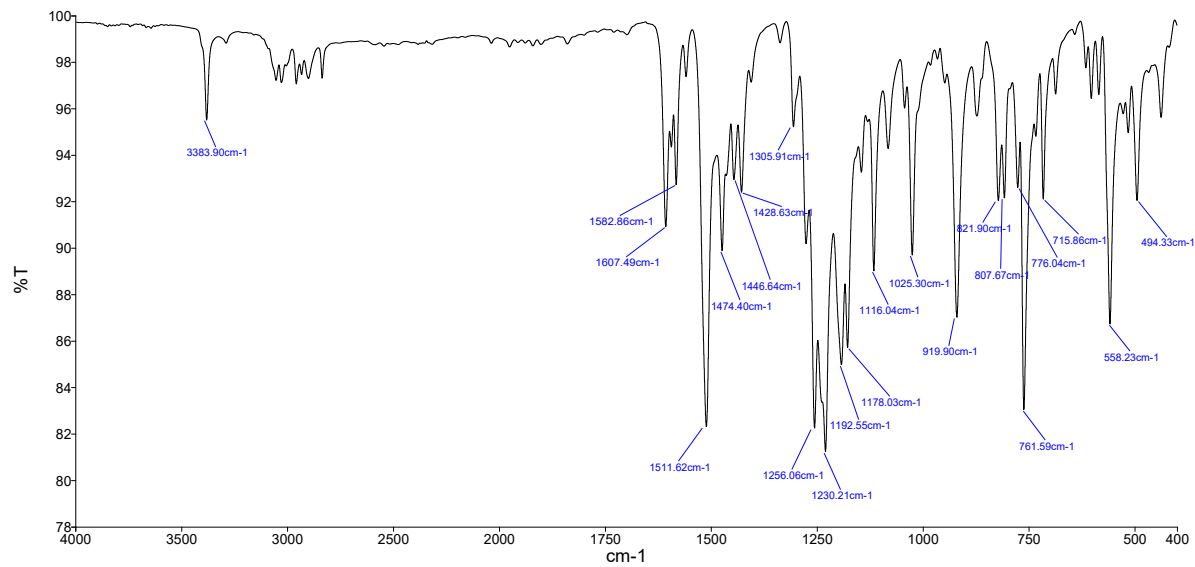

Figure 9: FT-IR spectroscopy of compound **FR3**

### Compound FR4

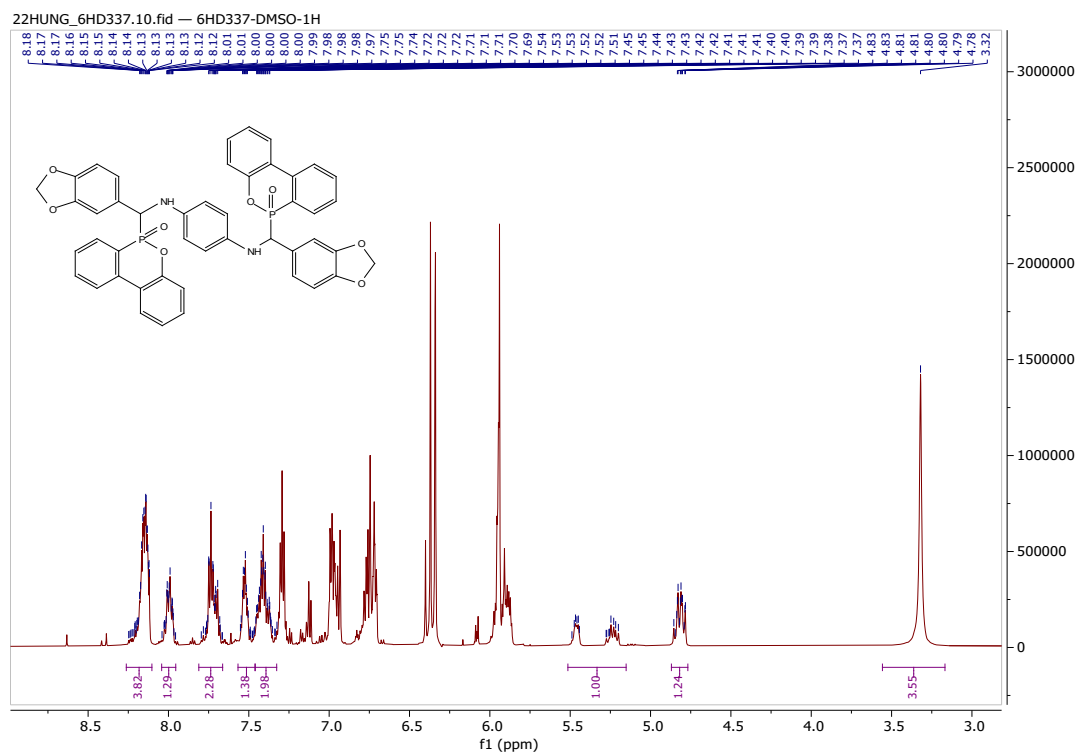

Figure 10: <sup>1</sup>H NMR spectroscopy of compound **FR4**

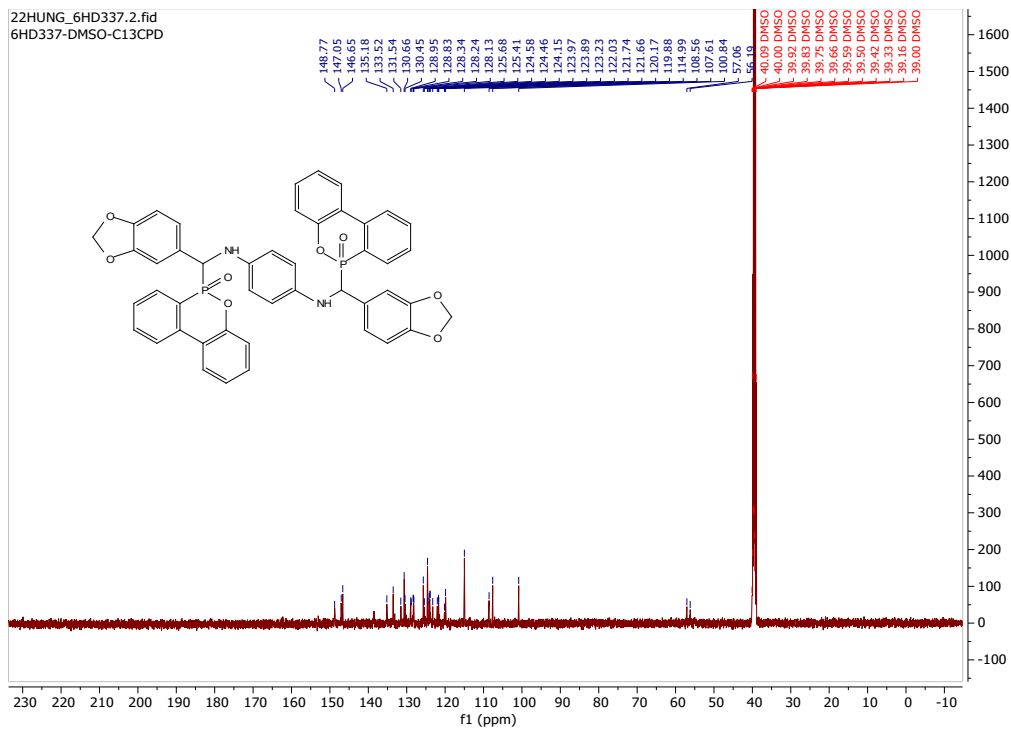

Figure 11:  $^{13}\text{C}$  NMR spectroscopy of compound **FR4**

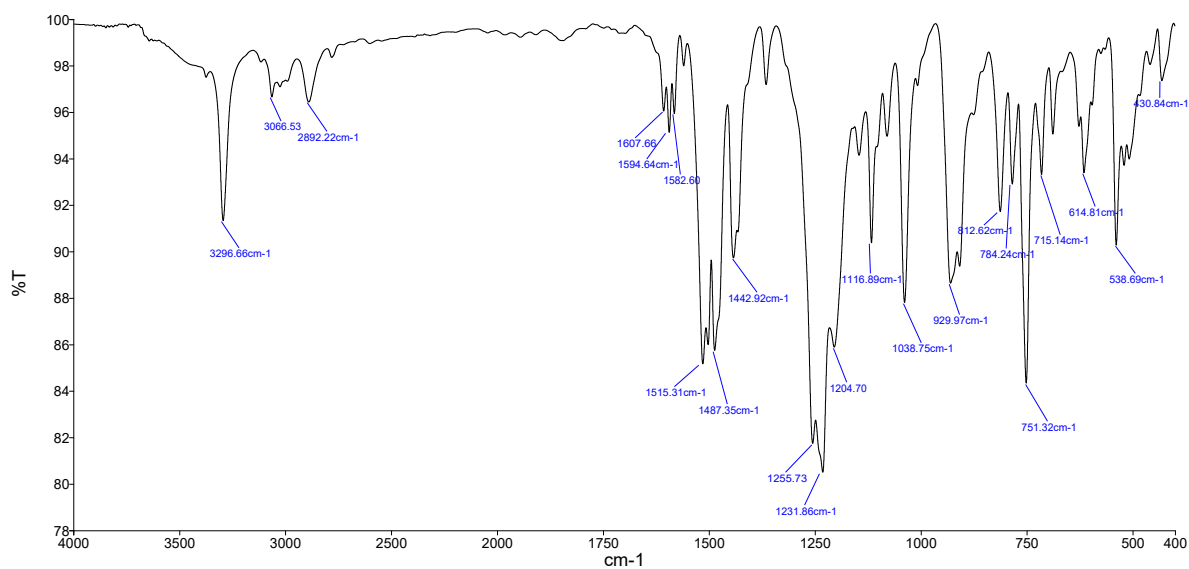

Figure 12: FT-IR spectroscopy of compound **FR4**

## Compound FR5

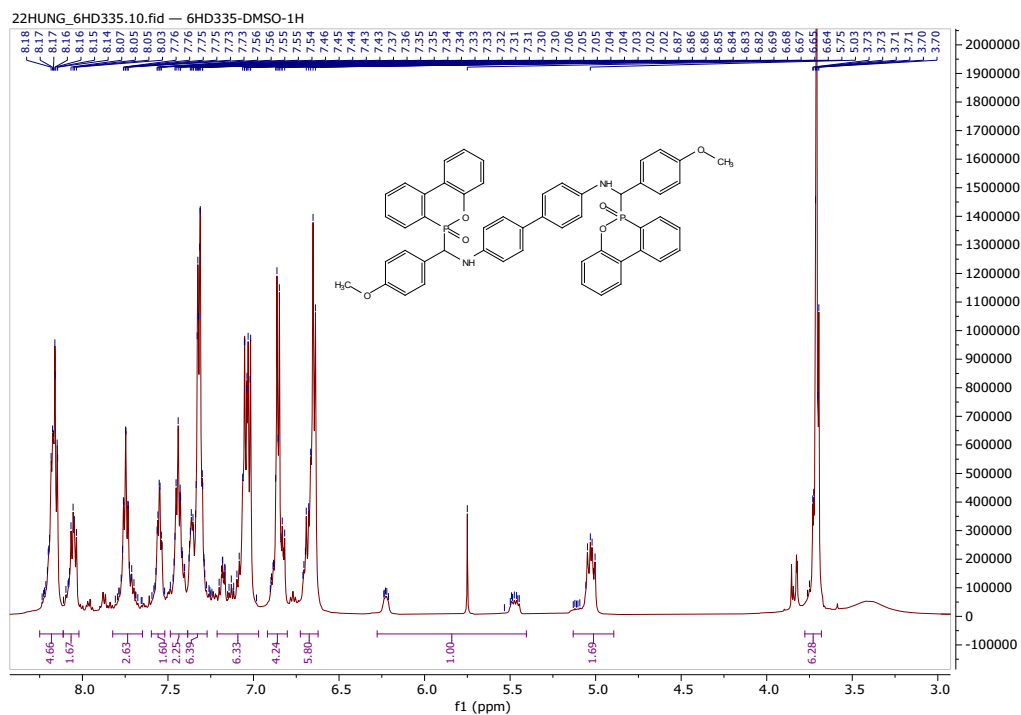

Figure 13:  $^1\text{H}$  NMR spectroscopy of compound **FR5**

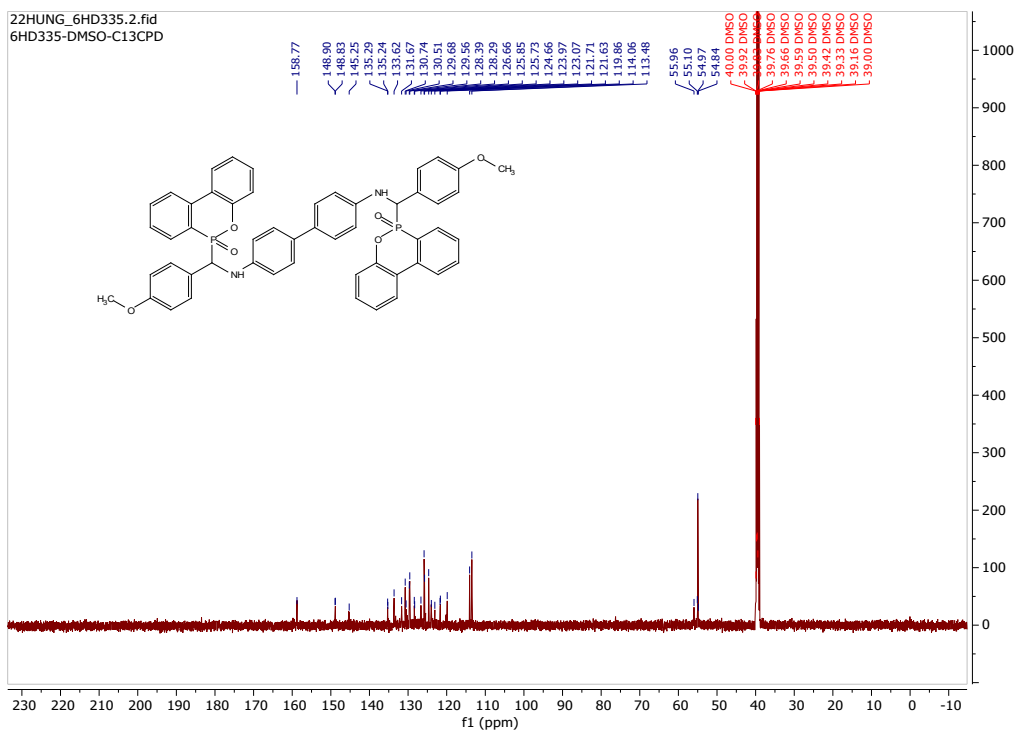

Figure 14:  $^{13}\text{C}$  NMR spectroscopy of compound **FR5**



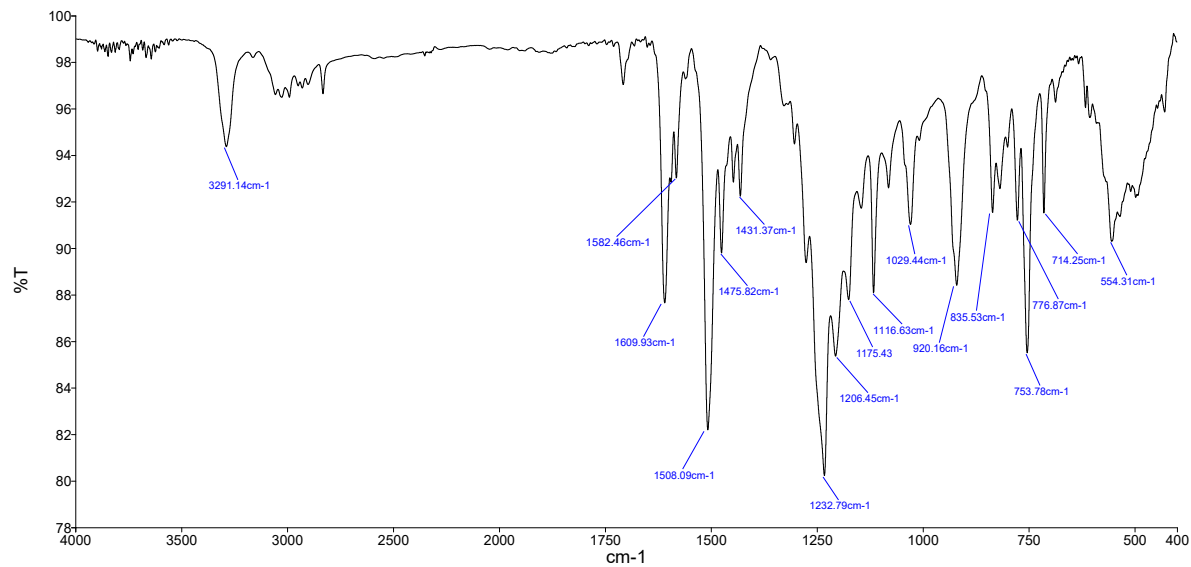

Figure 15: FT-IR spectroscopy of compound **FR5**

### Compound FR6

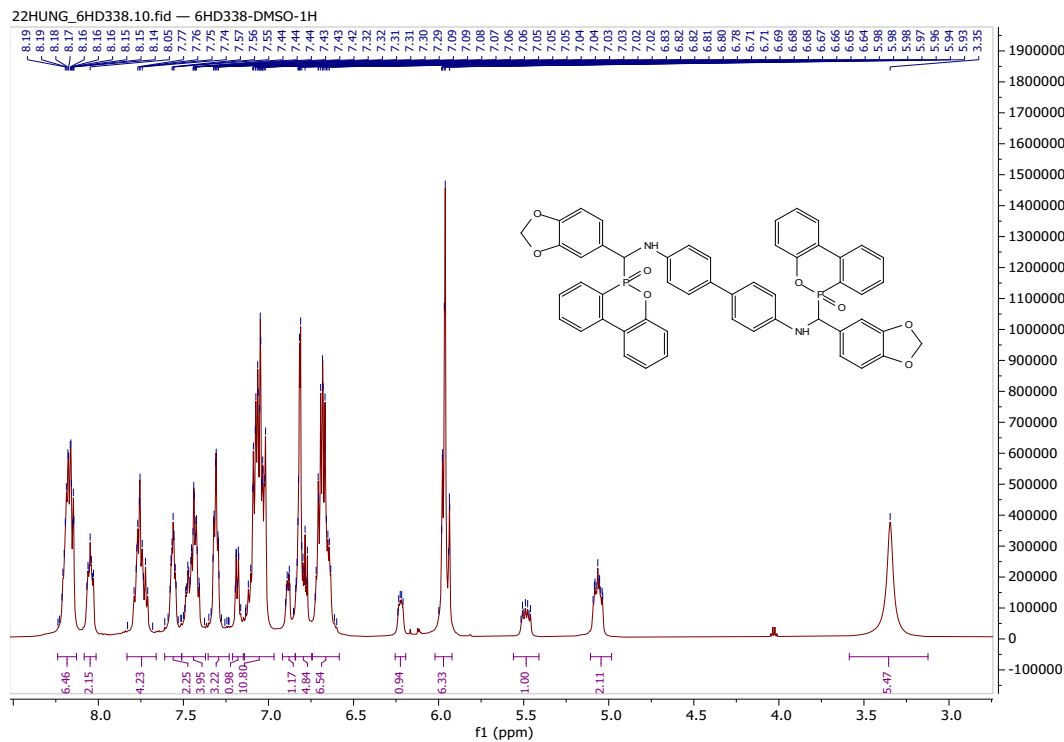

Figure 16: <sup>1</sup>H NMR spectroscopy of compound **FR6**

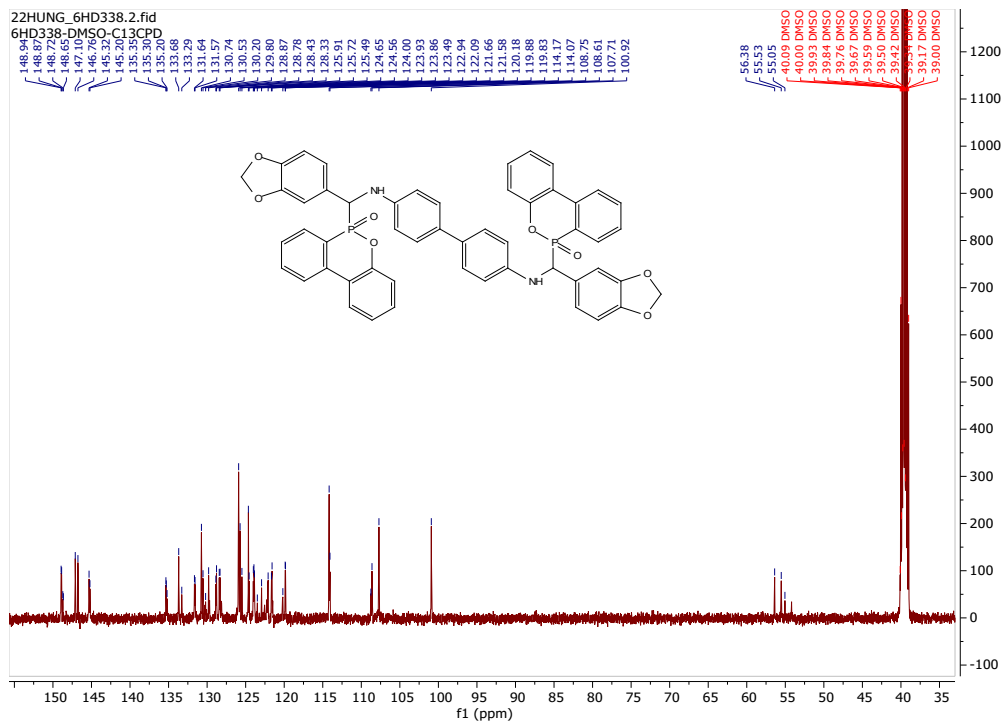

Figure 17:  $^{13}\text{C}$  NMR spectroscopy of compound **FR6**

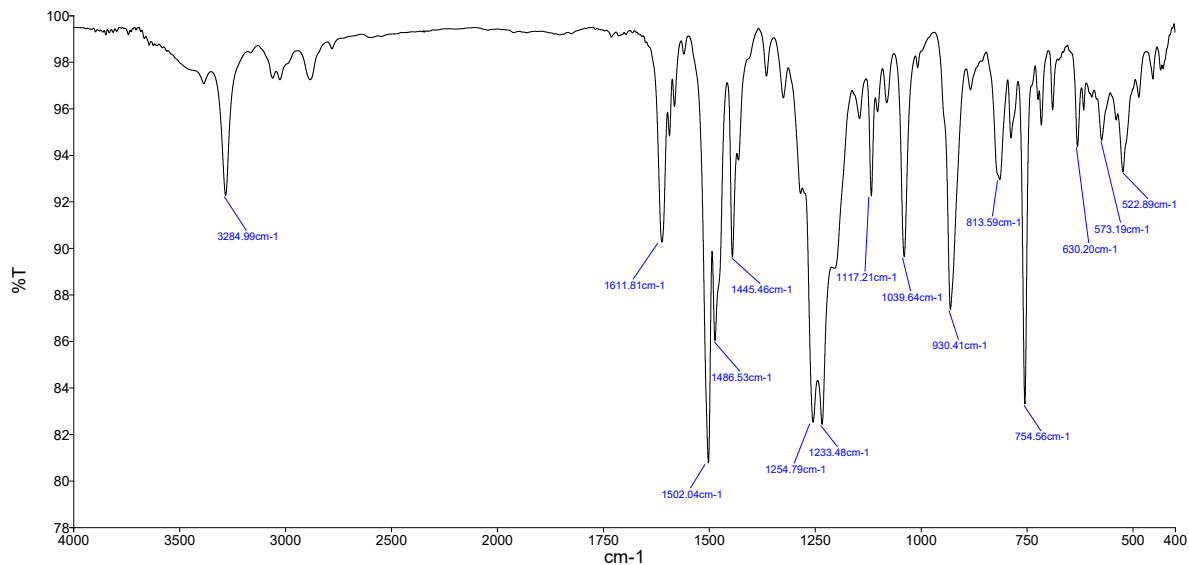

Figure 18: FT-IR spectroscopy of compound **FR6**

# Compound FR7

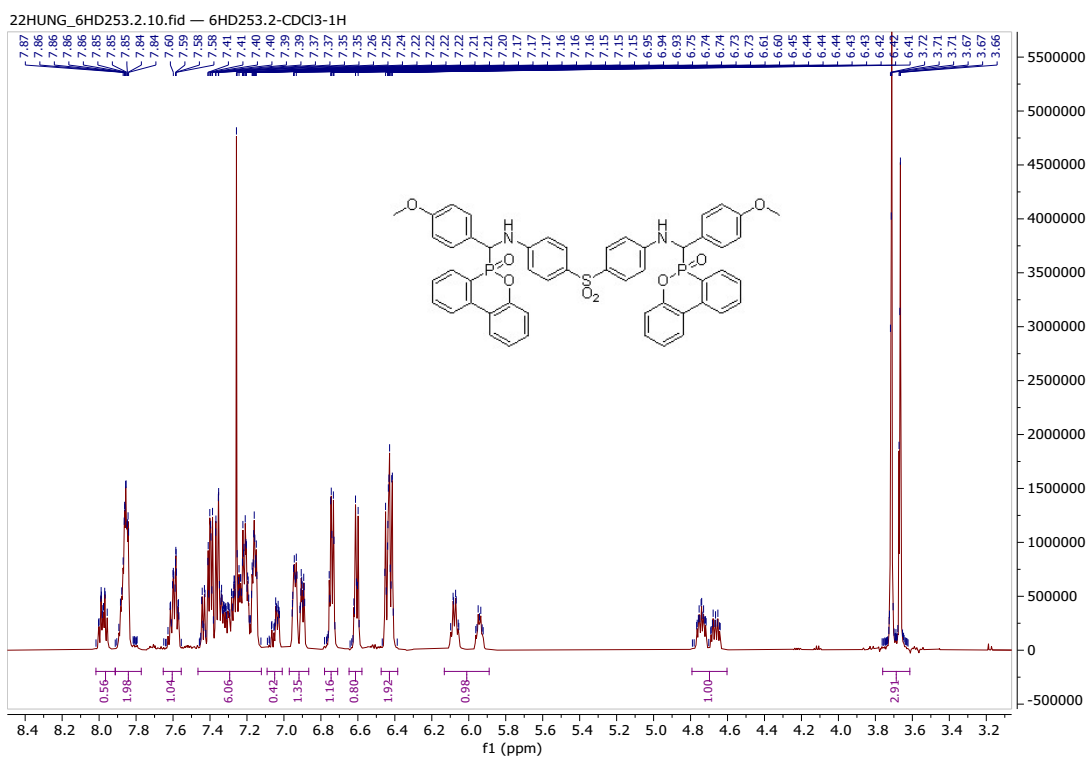

Figure 19: <sup>1</sup>H NMR spectroscopy of compound FR7

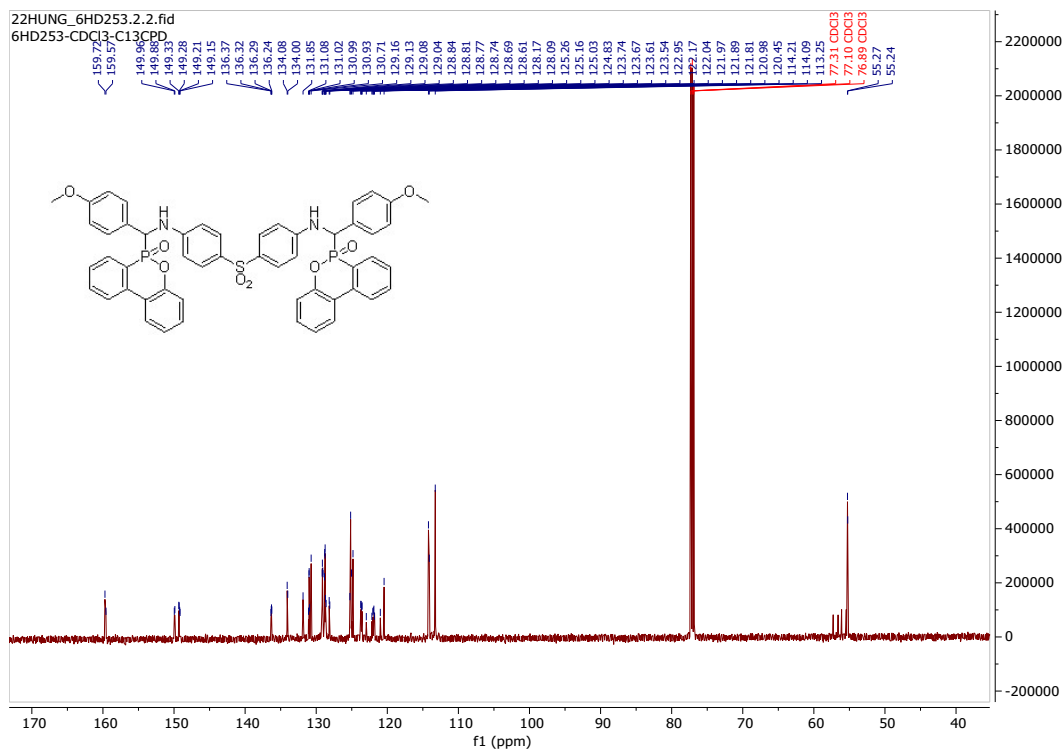

Figure 20: <sup>13</sup>C NMR spectroscopy of compound FR7

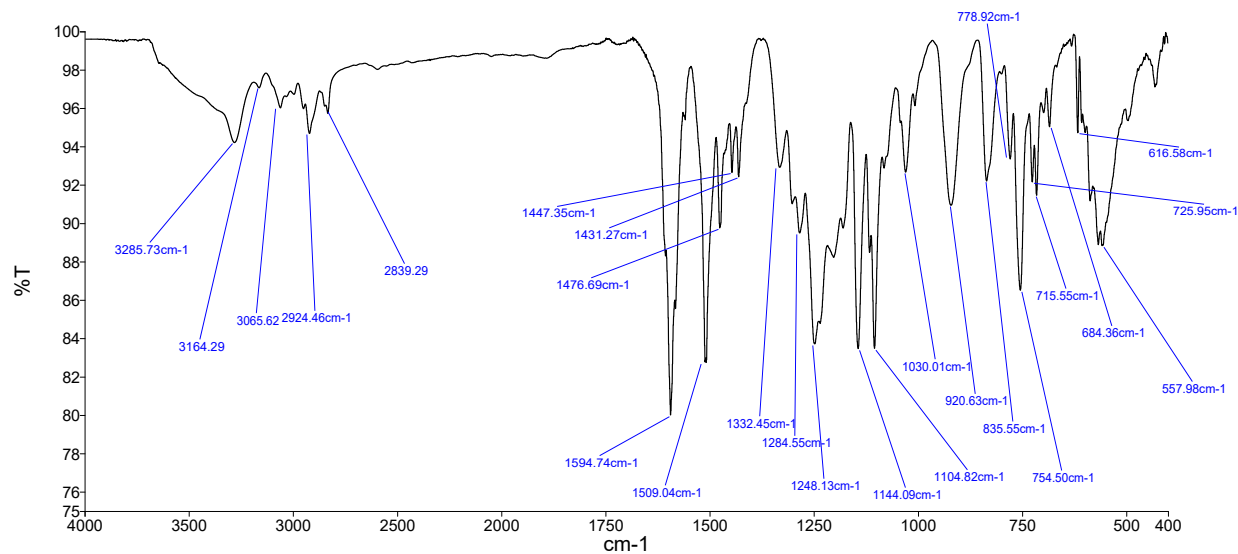

Figure 21: FT-IR spectroscopy of compound **FR7**

## Compound FR8

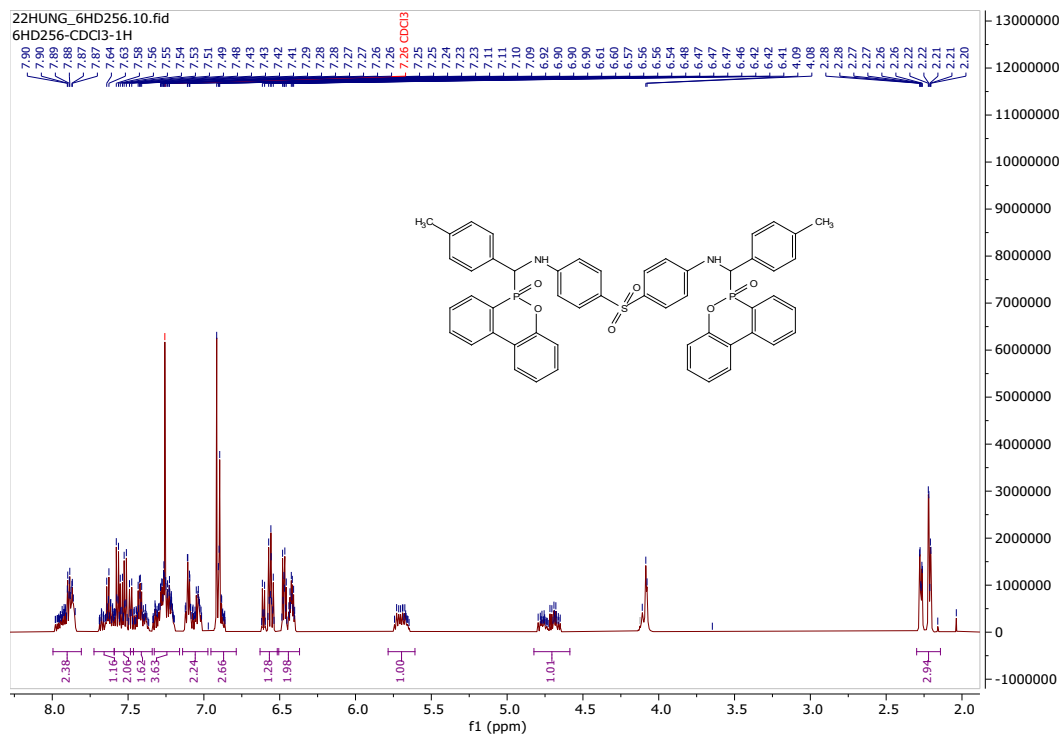

Figure 22: <sup>1</sup>H NMR spectroscopy of compound **FR8**

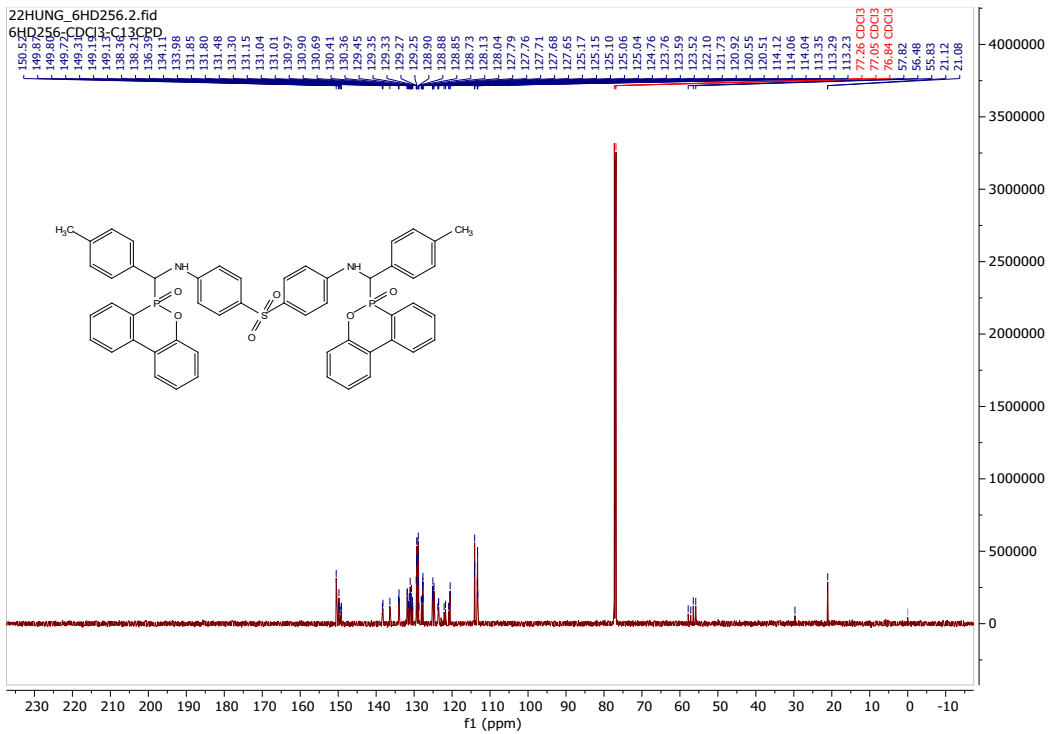

Figure 23:  $^{13}\text{C}$  NMR spectroscopy of compound **FR8**

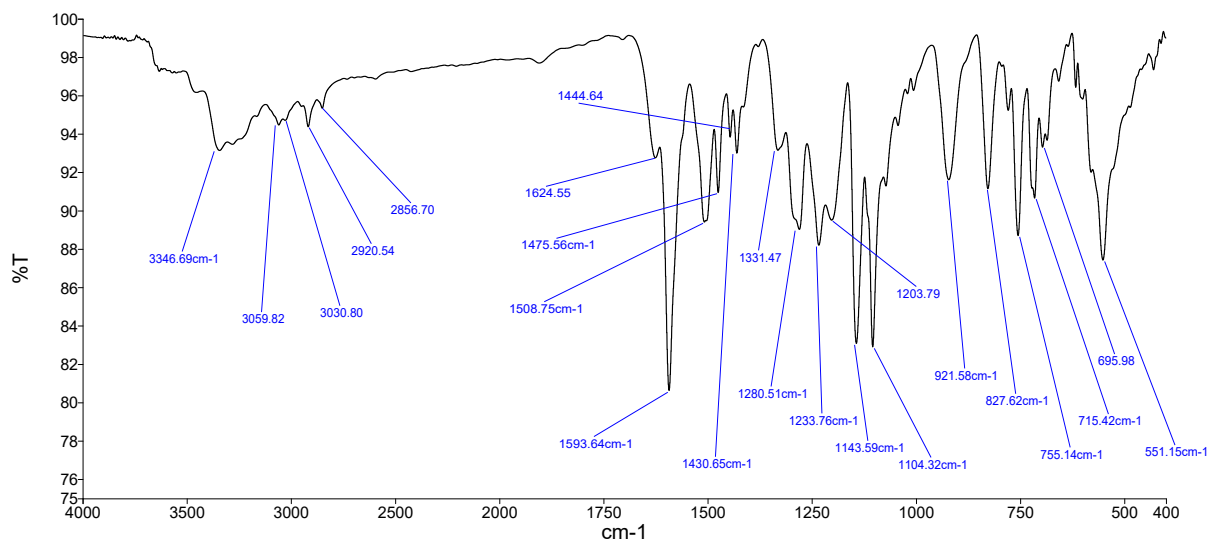

Figure 24: FT-IR spectroscopy of compound **FR8**

# Compound FR9

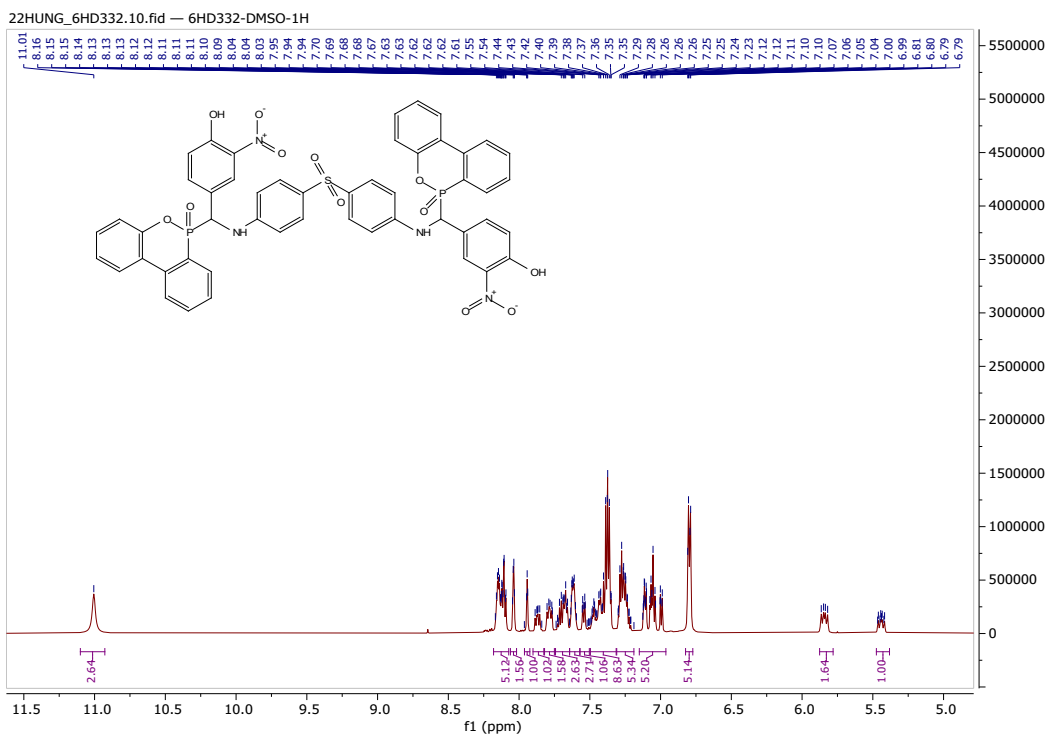

Figure 25:  $^1\text{H}$  NMR spectroscopy of compound FR9

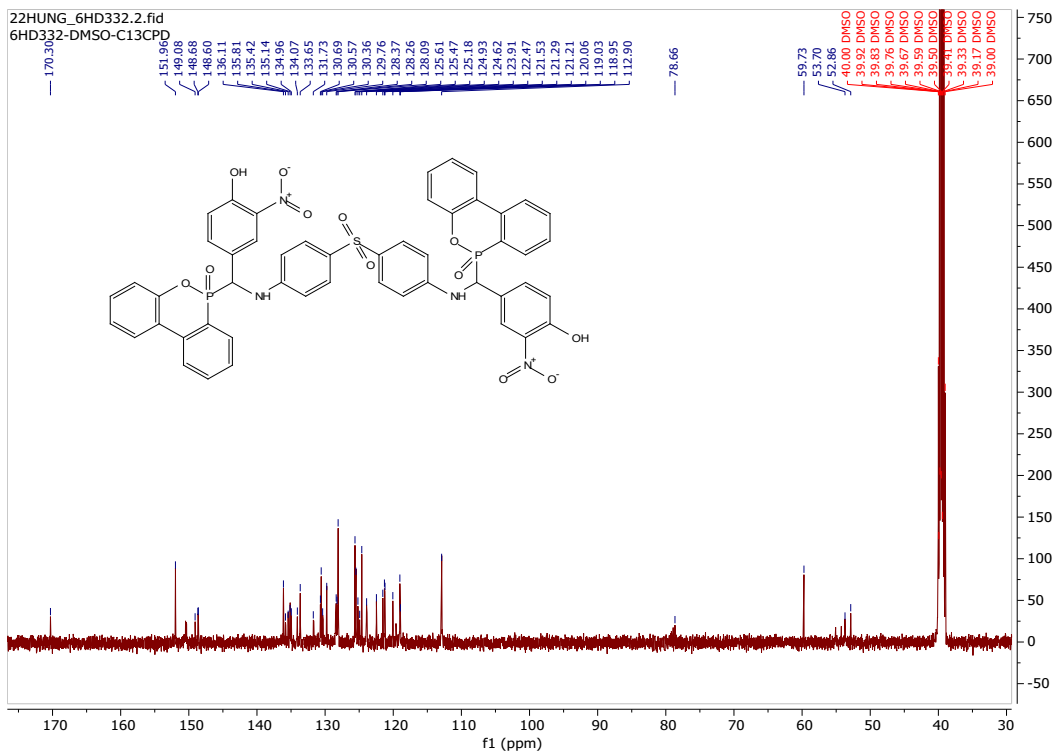

Figure 26:  $^{13}\text{C}$  NMR spectroscopy of compound FR9

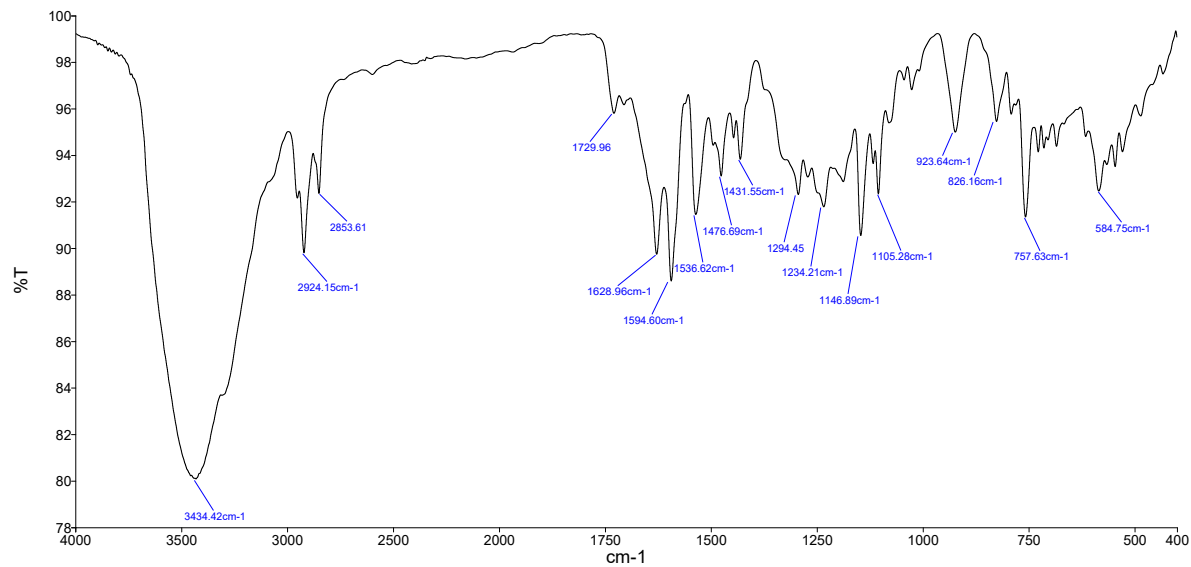

Figure 27: FT-IR spectroscopy of compound **FR9**

### Compound **FR10**

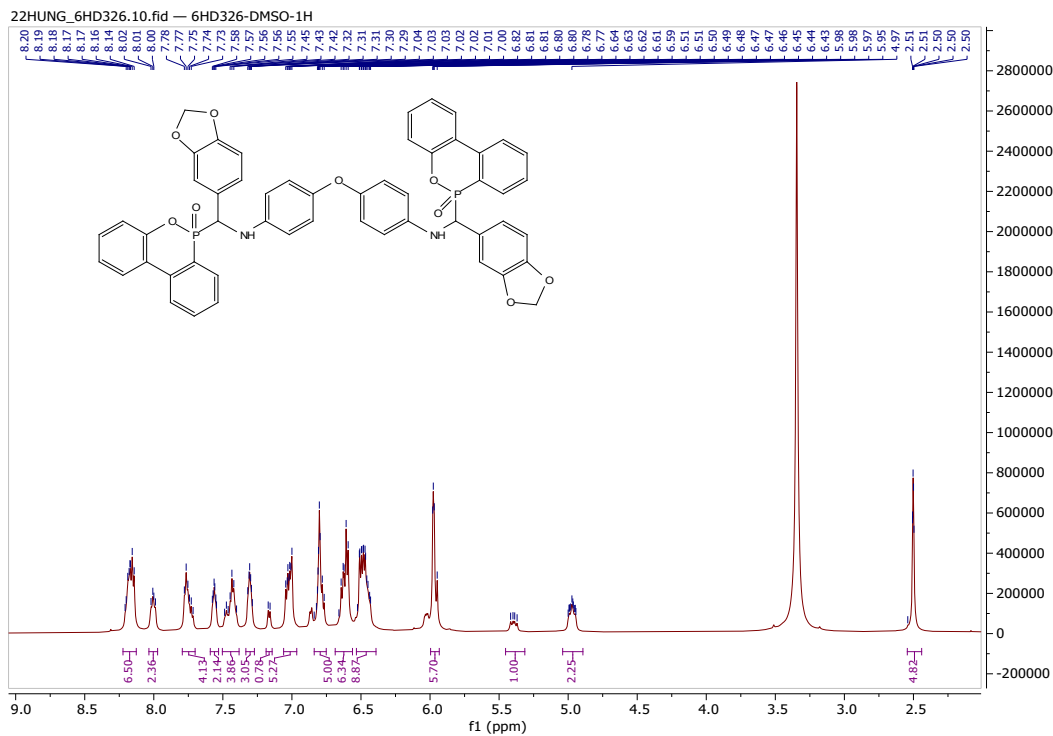

Figure 28: <sup>1</sup>H NMR spectroscopy of compound **FR10**

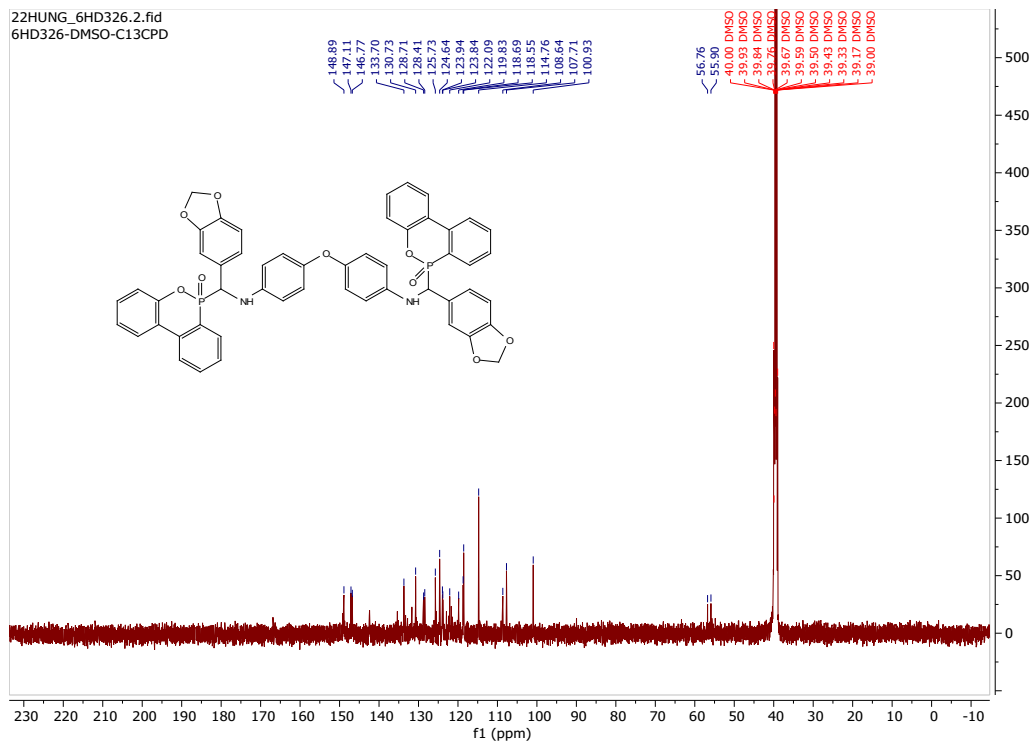

Figure 29:  $^{13}\text{C}$  NMR spectroscopy of compound **FR10**

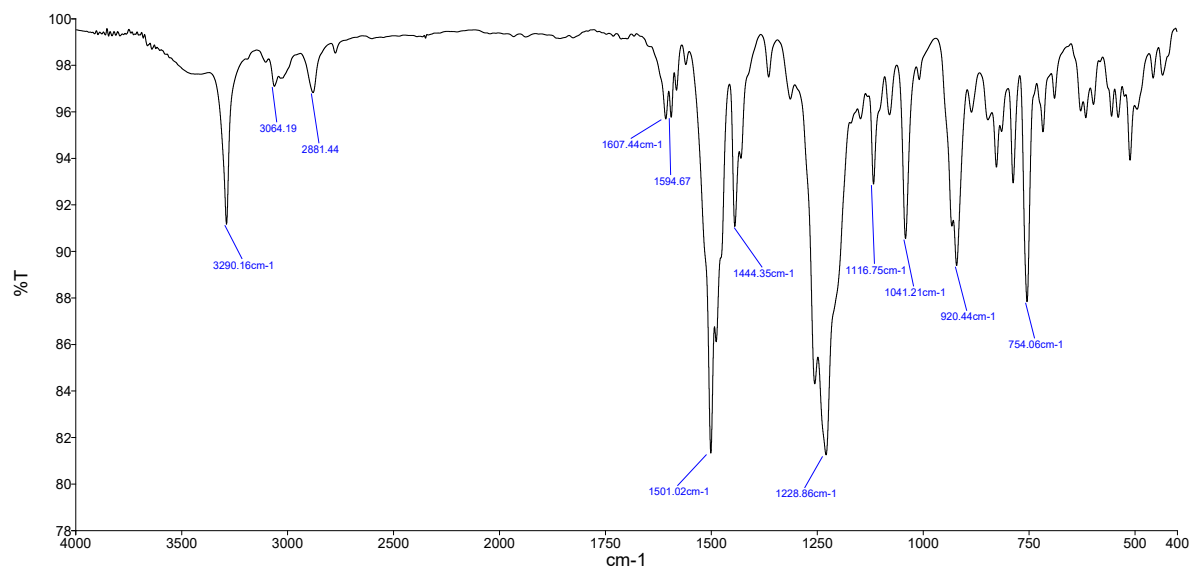

Figure 30: FT-IR spectroscopy of compound **FR10**



# Compound FR11

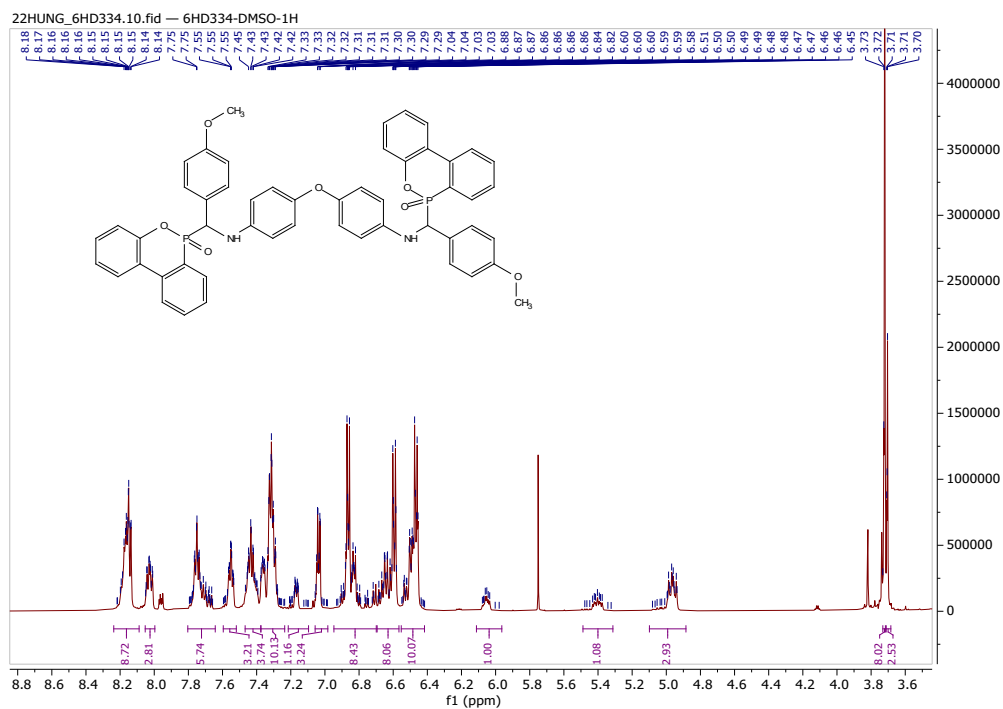

Figure 31: <sup>1</sup>H NMR spectroscopy of compound FR11

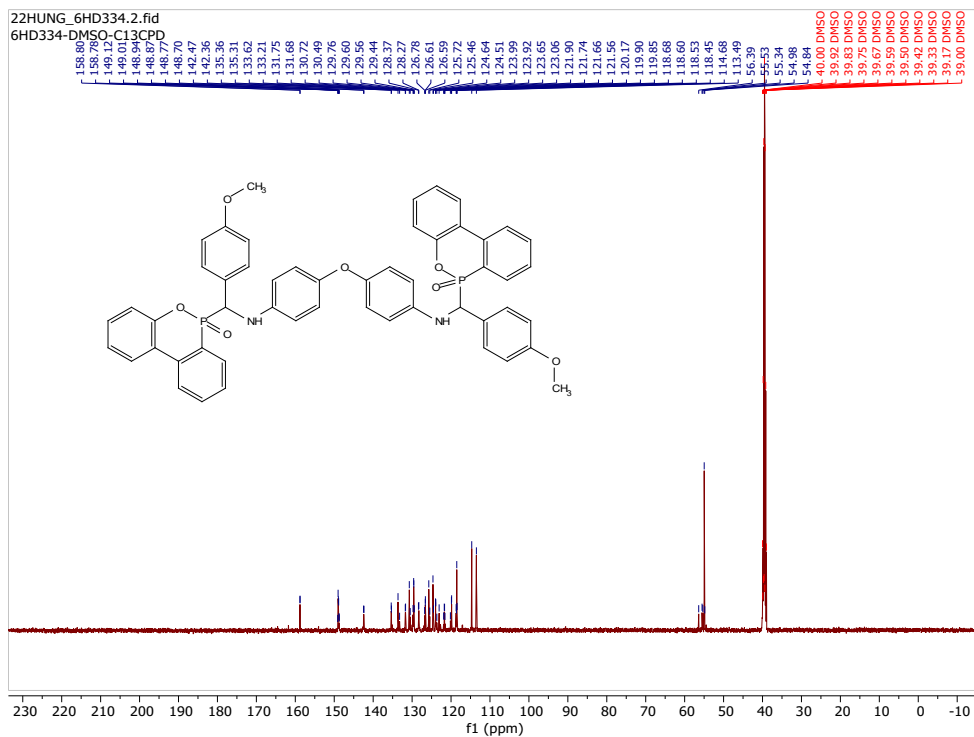

Figure 32: <sup>13</sup>C NMR spectroscopy of compound FR11

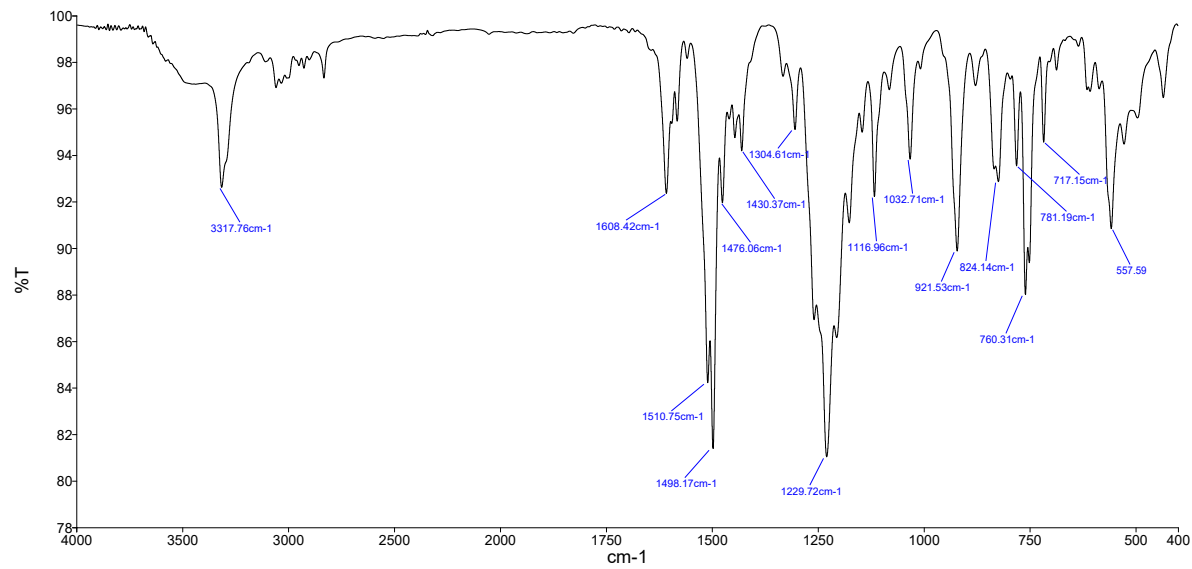

Figure 33: FT-IR spectroscopy of compound **FR11**

## Compound **FR12**

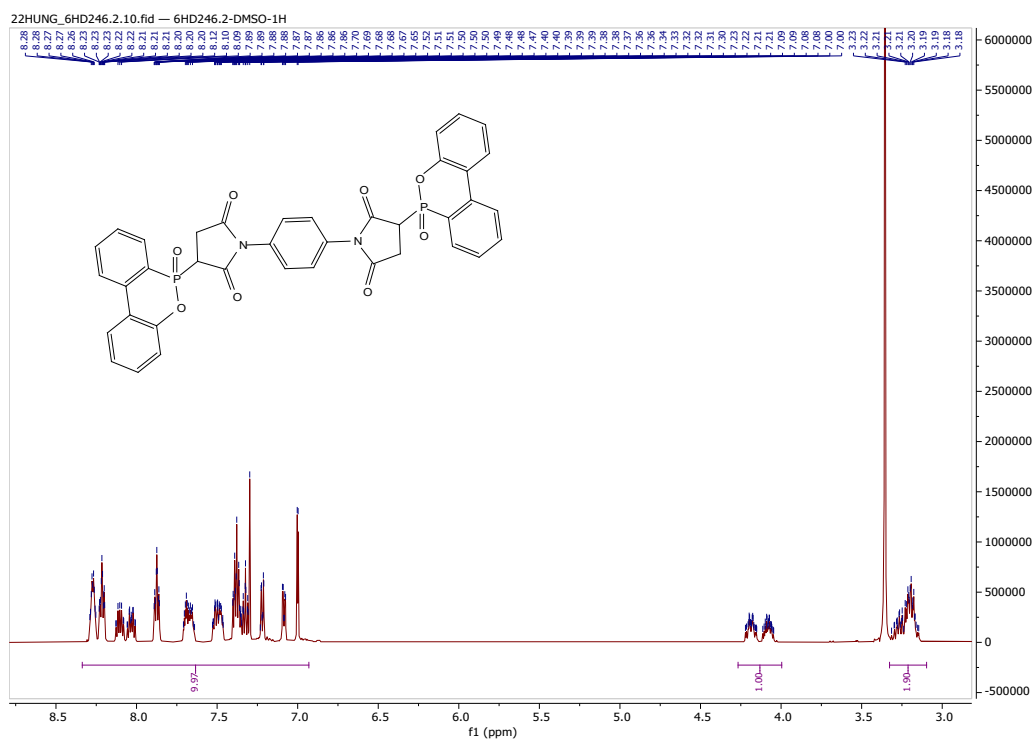

Figure 34:  $^1\text{H}$  NMR spectroscopy of compound **FR12**

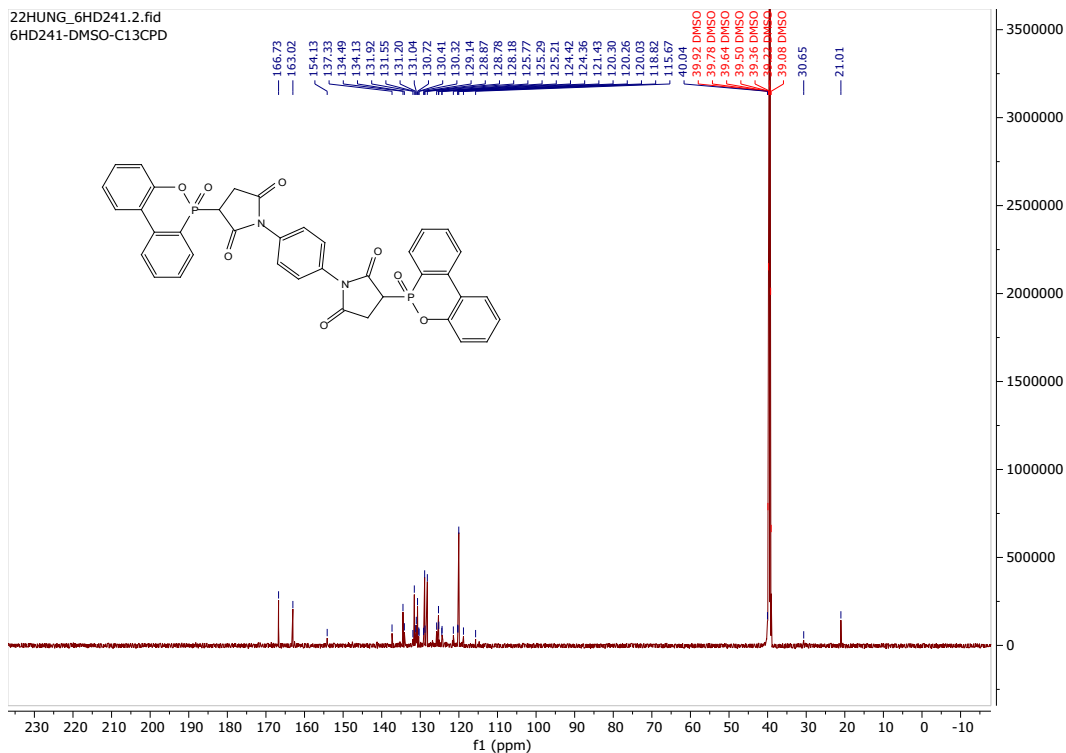

Figure 35:  $^{13}\text{C}$  NMR spectroscopy of compound **FR12**

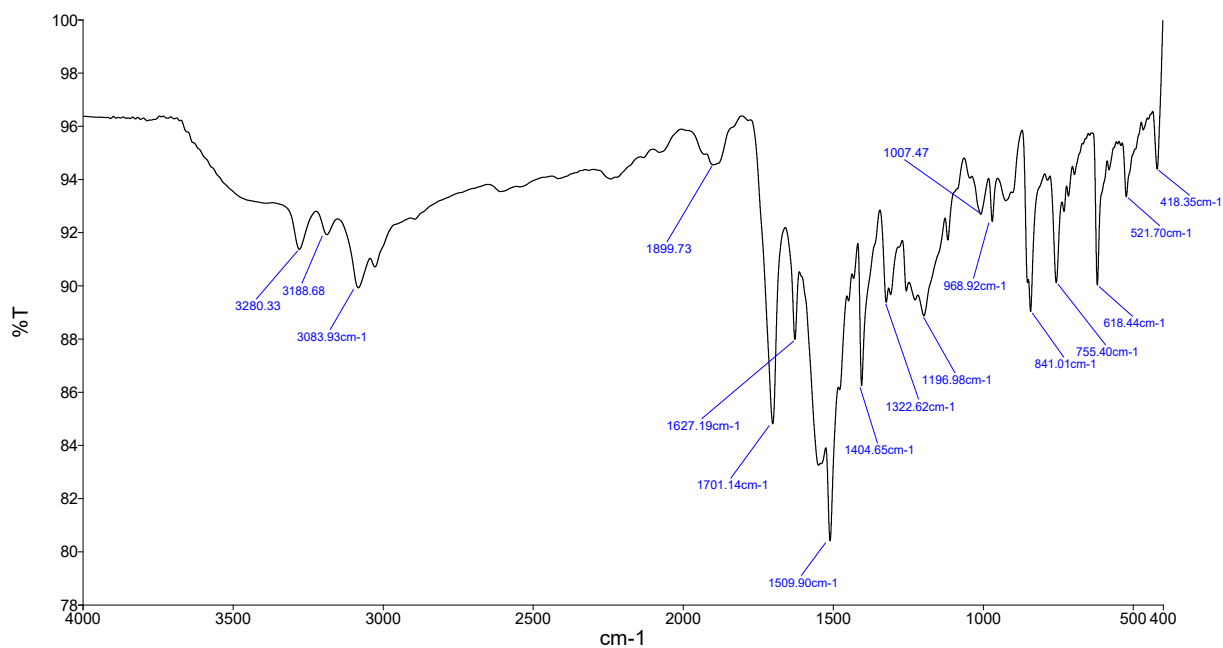

Figure 36: FT-IR spectroscopy of compound **FR12**

# Compound FR13

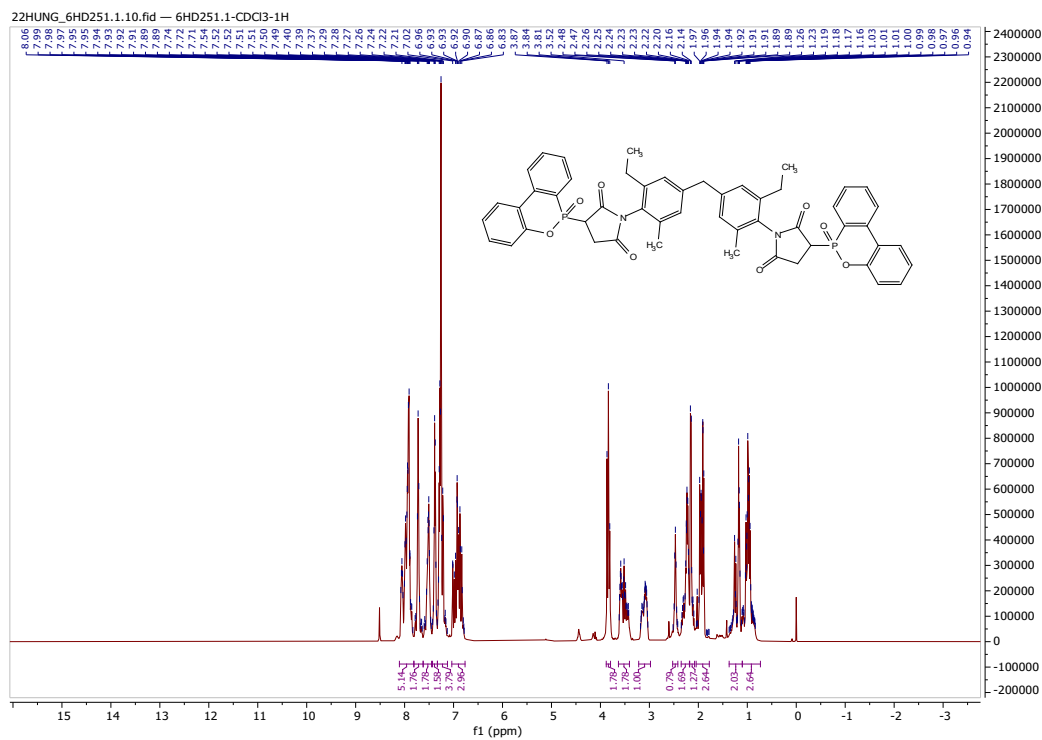

Figure 37:  $^1\text{H}$  NMR spectroscopy of compound FR13

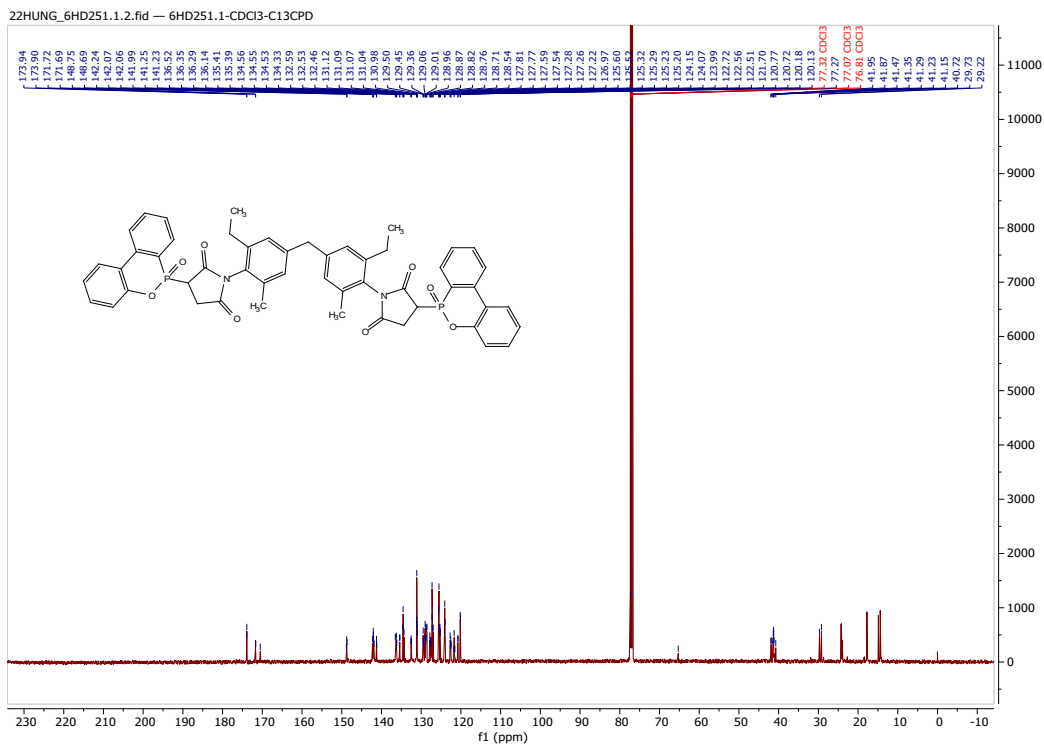

Figure 38:  $^{13}\text{C}$  NMR spectroscopy of compound FR13

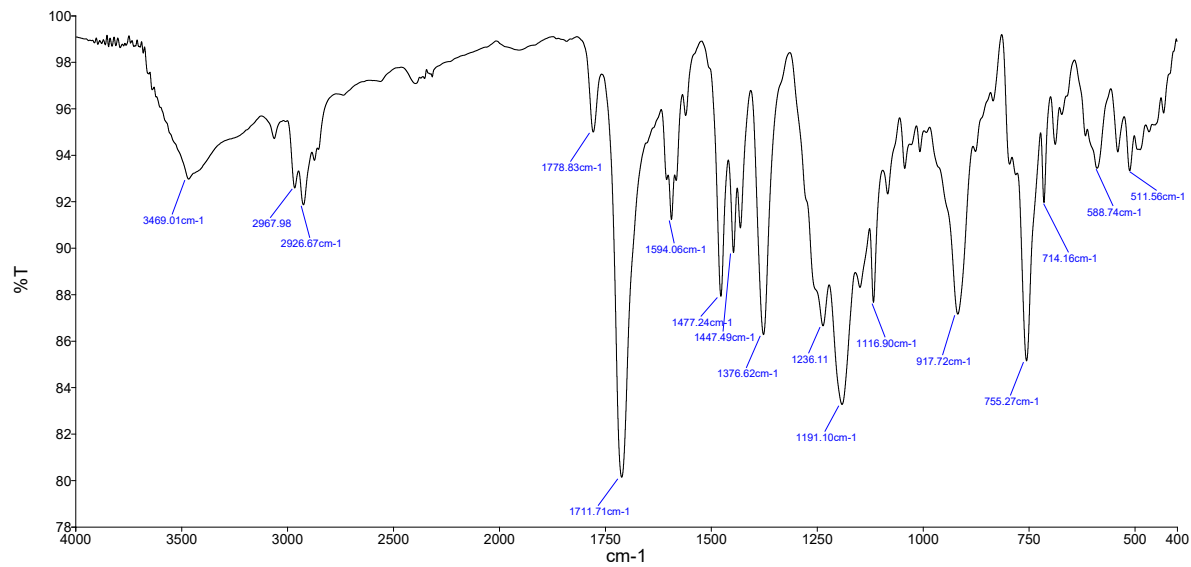

Figure 39: FT-IR spectroscopy of compound **FR13**

### Compound FR14

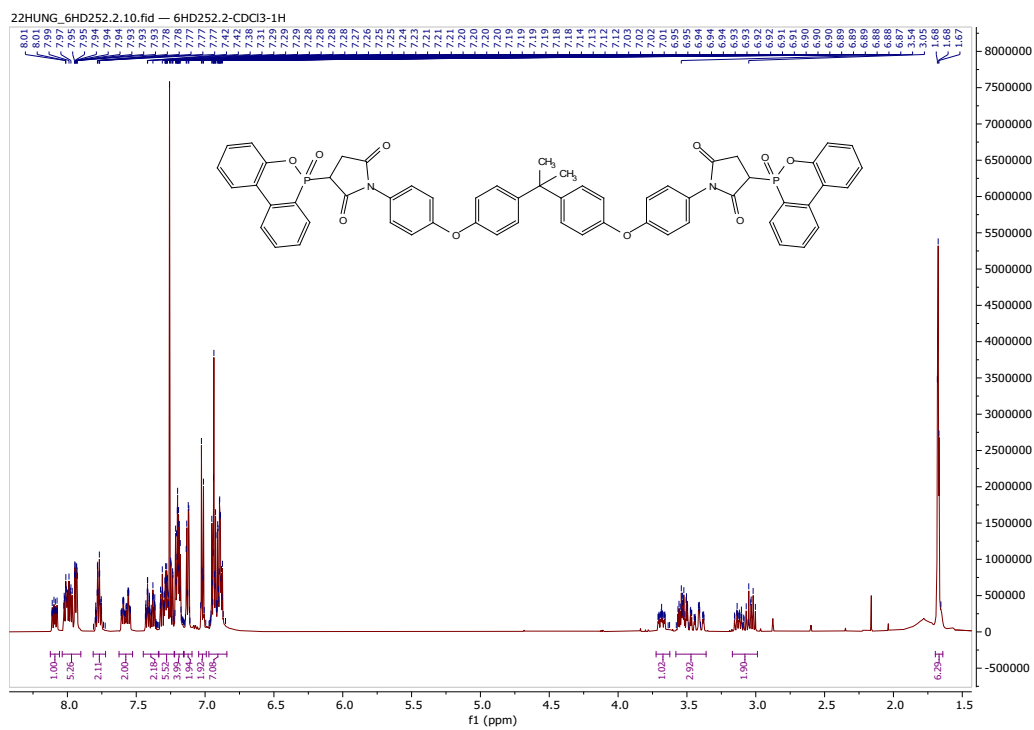

Figure 40: <sup>1</sup>H NMR spectroscopy of compound **FR14**

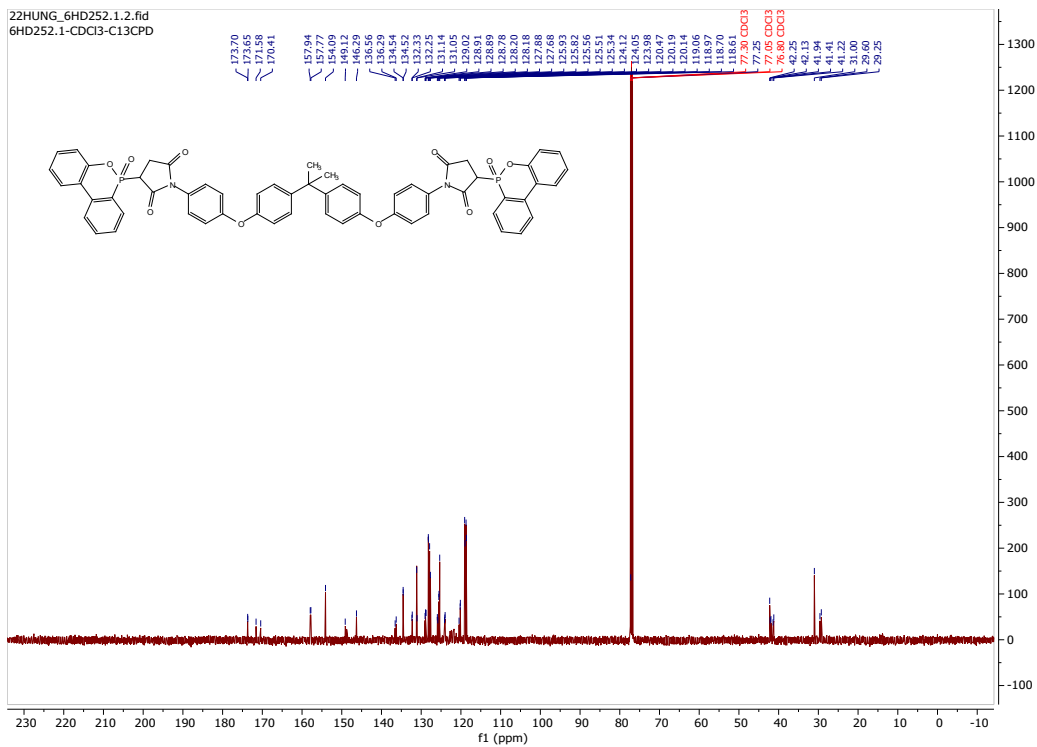

Figure 41:  $^{13}\text{C}$  NMR spectroscopy of compound FR14

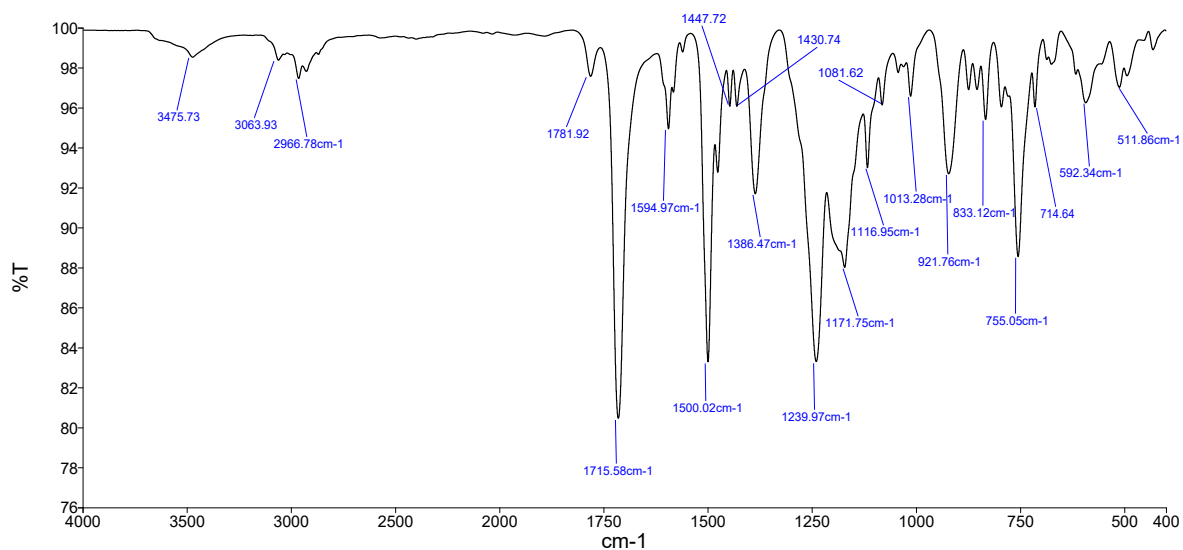

Figure 42: FT-IR spectroscopy of compound FR14

## Compound FR15

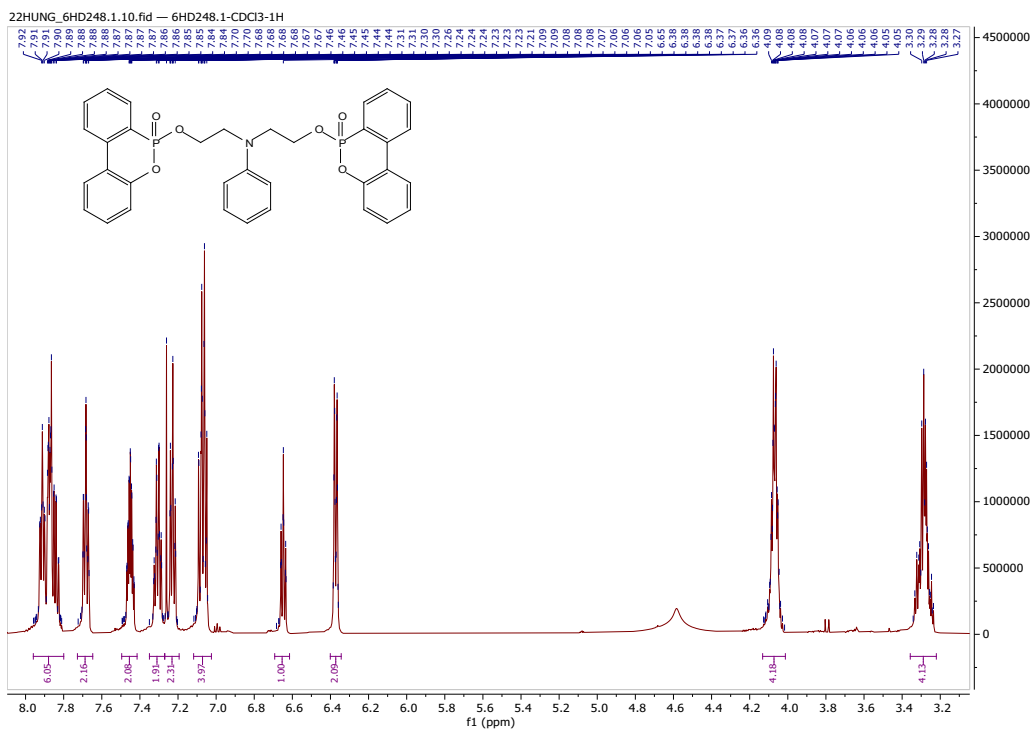

Figure 43: <sup>1</sup>H NMR spectroscopy of compound FR15

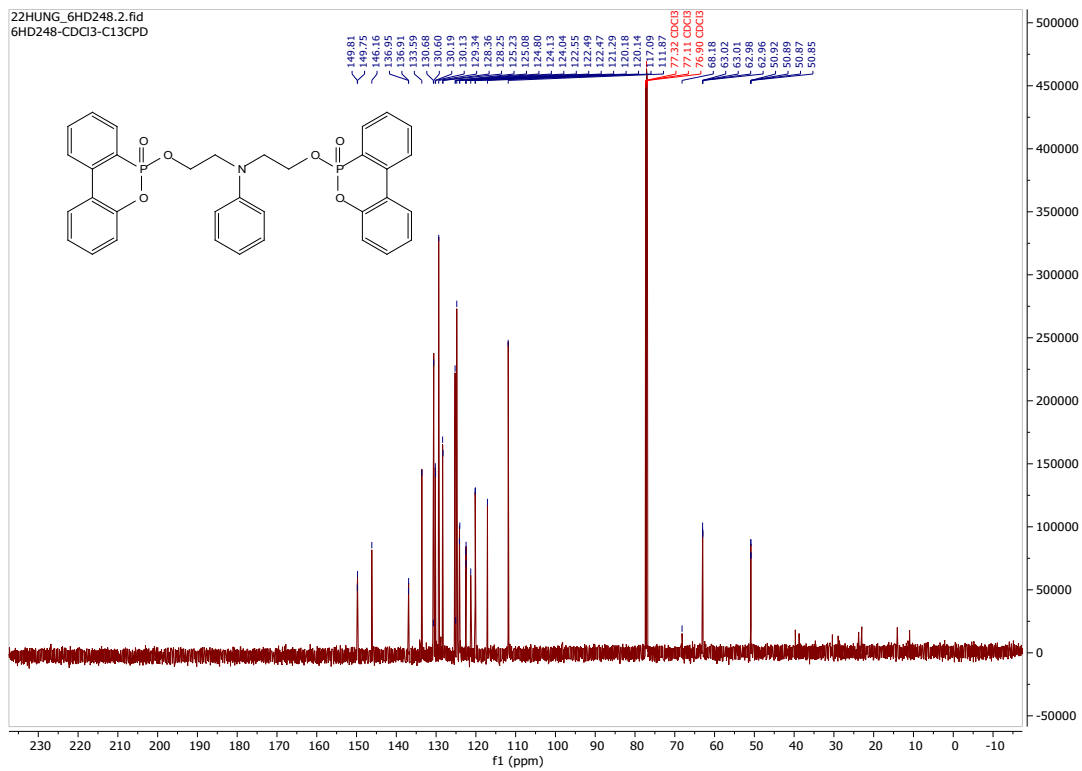

Figure 44: <sup>13</sup>C NMR spectroscopy of compound FR15

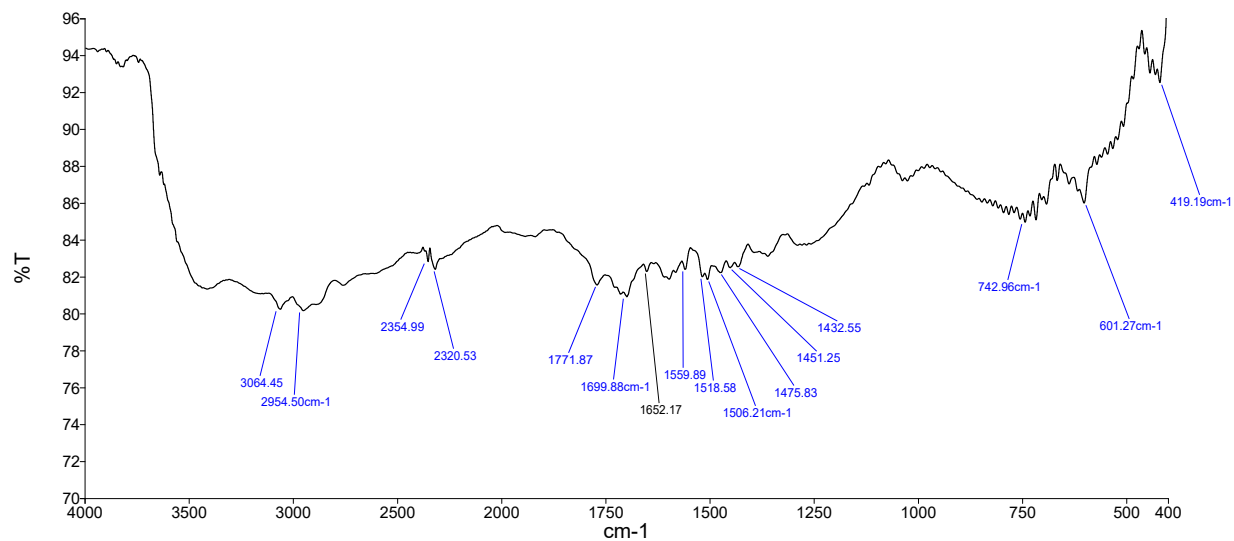

Figure 45: FT-IR spectroscopy of compound **FR15**

### Compound FR16

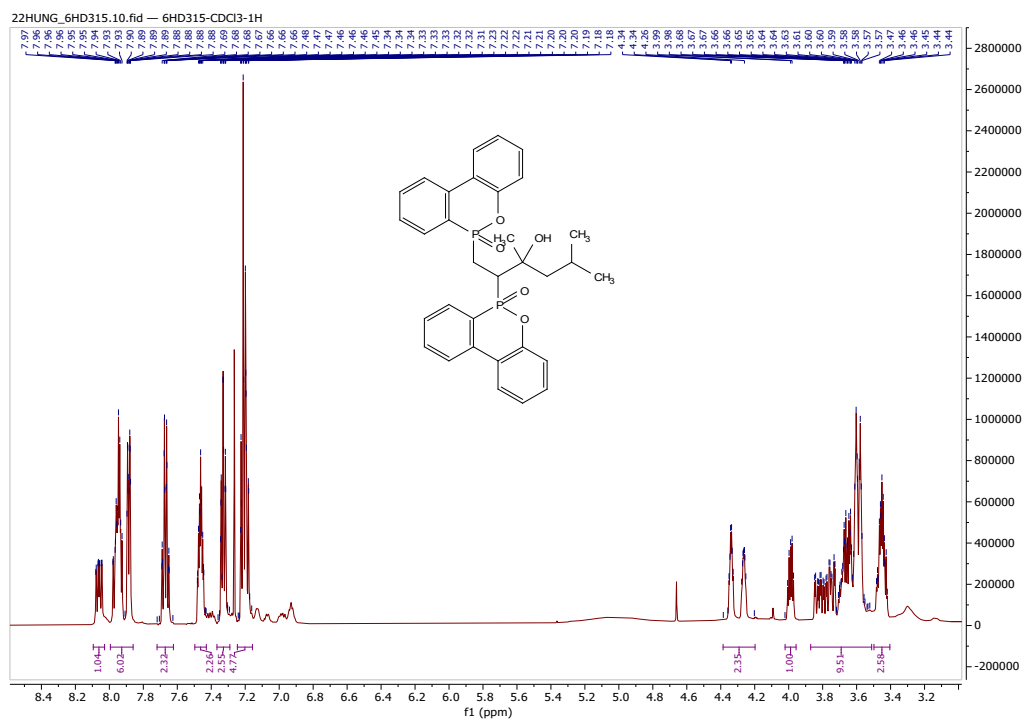

Figure 46: <sup>1</sup>H NMR spectroscopy of compound **FR16**



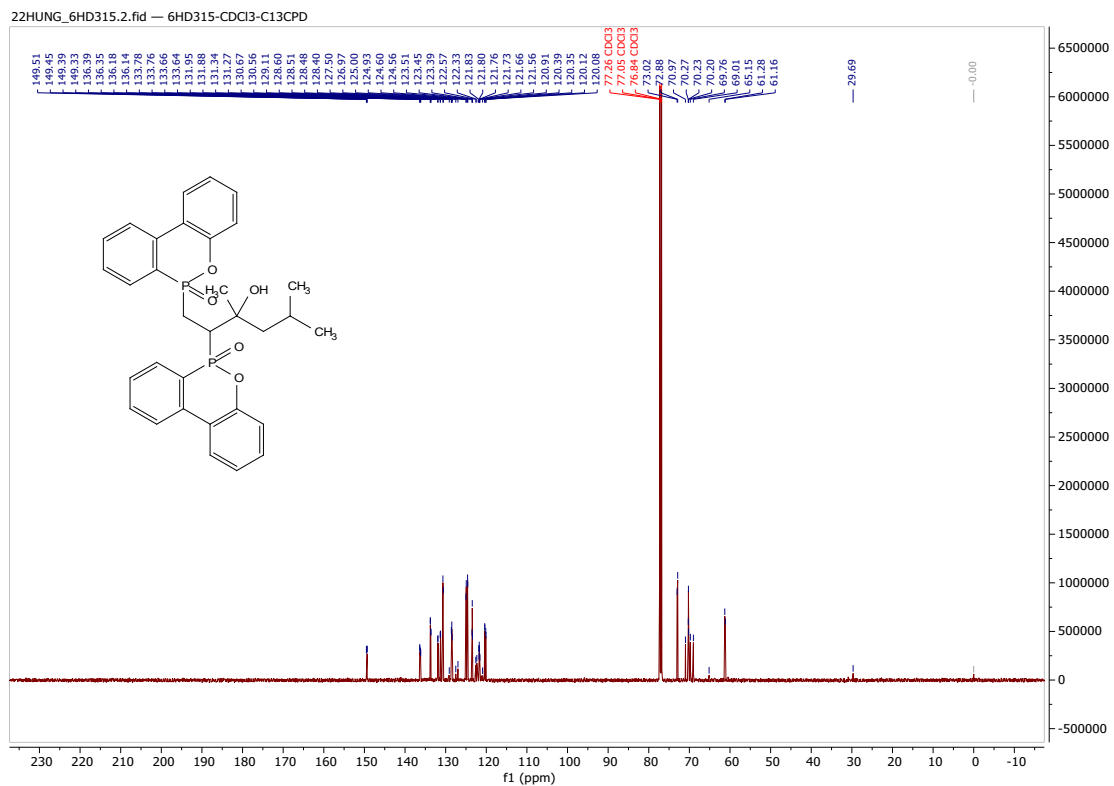

Figure 47:  $^{13}\text{C}$  NMR spectroscopy of compound **FR16**

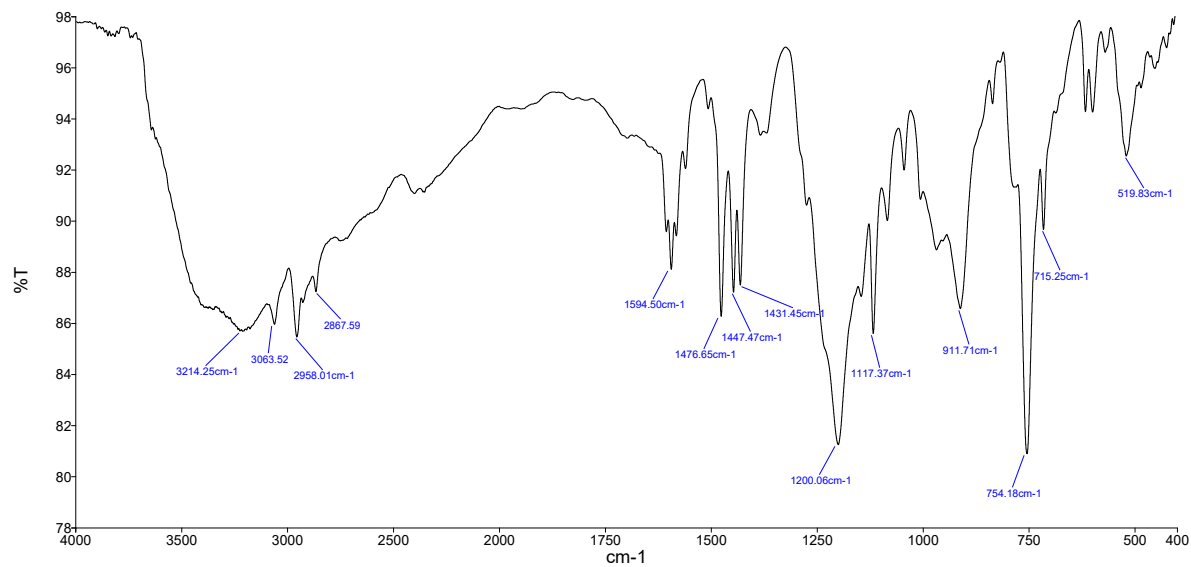

Figure 48: FT-IR spectroscopy of compound **FR16**

# APP-PEI

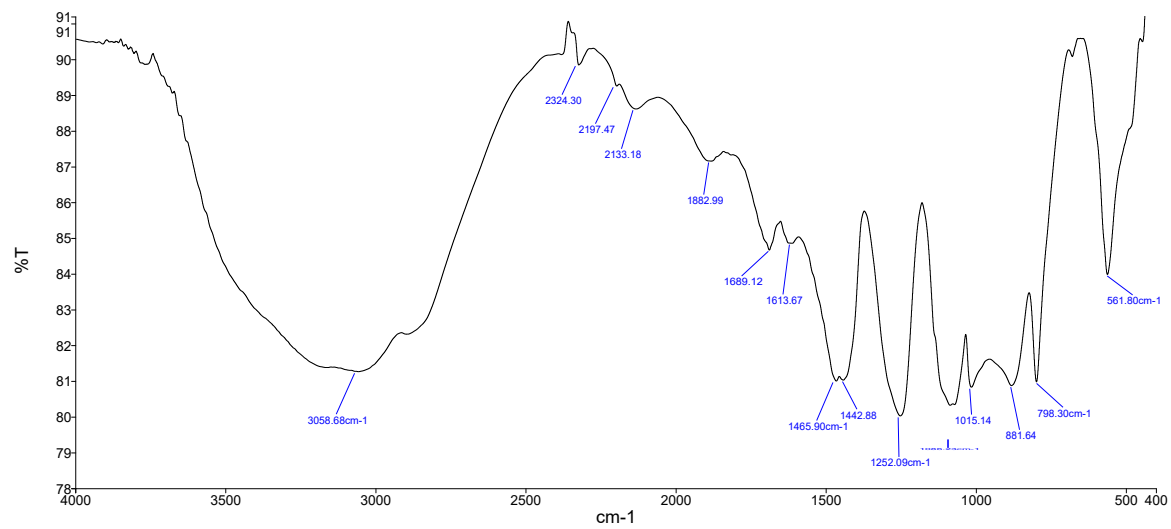

Figure 49: FT-IR spectroscopy of APP-PEI
